# Supplementary material for: Identification of potential druggable targets for endometriosis through Mendelian randomization analysis
Source: Front Endocrinol (Lausanne). 2025 Jan 22;15:1371498. doi: 10.3389/fendo.2024.1371498 (PMC11794050; doi:10.3389/fendo.2024.1371498)
Supplement: Supplementary file 1 [file Table1.xlsx]

## Sheet: Table List
Supplementary Table 1 Genetic instruments of plasma and brain proteins for MR analysis
Supplementary Table 2 Genetic instruments for external valadation
Supplementary Table 3 Genetic instruments of endometriosis for bidirectional MR
Supplementary Table 4 Phenotype scanning summary of RSPO3
Supplementary Table 5 Tweenty-three medications for endometriosis and their corresponding drug targets
Supplementary Table 6 Interacted proteins between potential drug targets and current medications targeting proteins
Supplementary Table 7 KEGG pathway enrichment analysis for 29 suggestive proteins

## Sheet: Table S1
			Genetic instruments of plasma and brain proteins for MR analysis
Tissue	exposure	UniProt	SNP	chr	pos	effect_allele	other_allele	beta	se	pval	eaf	samplesize	Author	F_statistics
Plasma	ACP1	A0A140VK37;P24666;Q59EH3	rs11553746	2	272203	T	C	1.237	0.026037	1e-200	0.324799	996	Suhre	2257.13
Plasma	ACP5	A0A024R7F8;P13686	rs79061565	19	11698659	G	C	-0.4845	0.0364	1.6e-40	0.122794	3301	Sun	177.168
Plasma	ADA2	Q9NZK5;B4E3Q4;A0A087X0I3	rs2231495	22	17669306	C	T	-0.8794	0.0214	1e-200	0.332516	3301	Sun	1688.67
Plasma	ADAM23	A0A024R3W8;O75077;E7EWD3	rs1921673	2	207324282	G	A	0.4321	0.0255	3.2e-64	0.6846	3301	Sun	287.136
Plasma	ADAMTS13	Q76LX8	rs71503194	9	136298131	G	T	-0.8719	0.0404	4.4e-103	0.091229	3301	Sun	465.769
Plasma	ADGRE2	A0JNV7;Q9UHX3	rs7260110	19	14501544	G	A	0.2969	0.0447098	5.169e-11	0.35994	996	Suhre	44.0977
Plasma	ADM	P35318	rs2923091	11	10358145	A	G	-0.204	0.025	2.28e-16	0.662	6861	Yao	66.5856
Plasma	AFM	P43652	rs41265665	4	74361142	A	G	-0.8615	0.121941	3.033e-12	0.0323559	989	Suhre	49.9123
Plasma	AGT	B0ZBE2;B2R5S1;P01019	rs2493151	1	230878561	A	G	0.3349	0.0494802	2.223e-11	0.234909	994	Suhre	45.8107
Plasma	AHSG	P02765	rs35094235	3	186328951	G	T	0.6252	0.0255	2e-132	0.731004	3301	Sun	601.115
Plasma	AKR1A1	P14550;V9HWI0	rs72688441	1	46051053	A	G	-1.18	0.0493	1.2e-126	0.058959	3301	Sun	572.889
Plasma	AKR1B1	A0A024R7A8;P15121	rs2229542	7	134135621	C	T	-0.8187	0.1045	4.7e-15	0.014337	3301	Sun	61.3786
Plasma	AKR1C1	Q04828	rs145648894	10	5009739	G	T	0.3894	0.0393	3.8e-23	0.111375	3301	Sun	98.1763
Plasma	ALCAM	Q13740;B3KNN9	rs9830049	3	105284045	C	T	-0.306	0.0374	2.8e-16	0.120272	3301	Sun	66.9421
Plasma	ALDH3A1	P30838;Q6PKA6;I3L3I9	rs887241	17	19645938	C	A	0.2421	0.0259	7.8e-21	0.661635	3301	Sun	87.3756
Plasma	AMY1A	P04745;Q6NSB3	rs7538379	1	104067356	T	C	-1.0399	0.062	4.9e-63	0.039949	3301	Sun	281.319
Plasma	ANG	P03950;W0UV28	rs17114671	14	21155270	C	T	0.8064	0.0595669	1.918e-38	0.118857	997	Suhre	183.27
Plasma	ANGPTL1	A0A024R908;O95841	rs16853043	1	178545926	G	A	0.4305	0.0247	5.4e-68	0.352388	3301	Sun	303.775
Plasma	APCS	P02743;V9HWP0	rs71632673	1	159536213	A	C	-0.8369	0.082	1.9e-24	0.022925	3301	Sun	104.164
Plasma	APMAP	Q9HDC9	rs8125909	20	24975835	C	A	0.2967	0.0363	2.8e-16	0.132064	3301	Sun	66.807
Plasma	APOA5	A0A0B4RUS7;Q6Q788	rs964184	11	116648917	C	G	0.2625	0.0363	4.9e-13	0.868979	3301	Sun	52.2932
Plasma	APOB	P04114;Q59HB3;Q7Z7Q0	rs520354	2	21259612	G	A	0.3033	0.0416763	6.929e-13	0.473394	996	Suhre	52.9622
Plasma	APOL1	O14791;Q2KHQ6;B1AH95	rs71314970	22	36638705	T	C	-0.3659	0.0409	3.5e-19	0.105762	3301	Sun	80.0347
Plasma	ARFIP1	B4E273;P53367;Q8N8M9;B7ZA10	rs4619875	4	153701130	T	C	0.239	0.0248	6.6e-22	0.403628	3301	Sun	92.8736
Plasma	ARSB	A0A024RAJ9;P15848;A8K4A0	rs13159135	5	78196689	C	G	-0.214	0.0248	5.9e-18	0.433907	3301	Sun	74.4602
Plasma	ART3	Q13508	rs4859610	4	77000441	G	A	-0.3378	0.0286	3e-32	0.774293	3301	Sun	139.504
Plasma	ART4	Q93070	rs1001096	12	14988455	A	G	0.74	0.0217	1e-200	0.397358	3301	Sun	1162.9
Plasma	ASAH2;ASAH2B	Q9NR71;P0C7U1	rs10740617	10	52027609	C	A	0.6665	0.0281	2e-124	0.793543	3301	Sun	562.584
Plasma	ASPH	Q12797;B7ZM96;A0A0A0MSK8;B4DQ07	rs112760834	8	62540134	T	G	-0.5784	0.0688	4.1e-17	0.033209	3301	Sun	70.6773
Plasma	ASPN	Q9BXN1;Q6P528	rs2516568	9	95187380	T	A	-0.4724	0.025	2.3e-79	0.323246	3301	Sun	357.059
Plasma	ATP1B2	P14415	rs1642762	17	7554772	T	C	-0.2881	0.0255	1.5e-29	0.586879	3301	Sun	127.646
Plasma	B3GAT3	Q5U676;G3V150;O94766	rs12794886	11	62383715	C	G	0.4422	0.0264	8.3e-63	0.707032	3301	Sun	280.562
Plasma	B4GALT1	P15291;W6MEN3	rs7019909	9	33113322	T	C	0.4478	0.0402	7.9e-29	0.102573	3301	Sun	124.084
Plasma	B4GALT2	O60909	rs2286241	1	44440769	C	G	-0.673	0.052	3e-38	0.056172	3301	Sun	167.503
Plasma	BPI	P17213	rs1780617	20	36974157	G	A	-0.6444	0.0371	1.1e-67	0.12241	3301	Sun	301.692
Plasma	BPIFB1	Q8TDL5	rs2424961	20	31694060	T	C	-0.4366	0.0245	3.9e-71	0.578579	3301	Sun	317.567
Plasma	BST1	Q10588	rs73224660	4	15714762	A	G	-1.3967	0.0239	1e-200	0.158997	3301	Sun	3415.16
Plasma	C1QC	A0A024RAA7;P02747	rs78865058	1	22944209	A	G	1.0754	0.0603	4.3e-71	0.041707	3301	Sun	318.057
Plasma	C1QTNF5	A0A024R3F8;Q9BXJ0	rs2248863	11	119207341	A	G	0.3261	0.0345	3.5e-21	0.141788	3301	Sun	89.3436
Plasma	C7	P10643;Q05CI3	rs429017	5	41263091	A	G	0.4333	0.0495145	9.039e-18	0.252792	985	Suhre	76.5794
Plasma	CA10	Q9NS85	rs117399000	17	50213731	A	G	-0.5939	0.0662	3e-19	0.037436	3301	Sun	80.4842
Plasma	CA13	Q8N1Q1	rs17741049	8	86198253	T	C	-0.7441	0.0799159	7.915e-20	0.0682046	997	Suhre	86.6954
Plasma	CA3	P07451;V9HWA3	rs2072696	8	86351051	C	G	-0.2169	0.0289	6.8e-14	0.23803	3301	Sun	56.3279
Plasma	CA6	B4DUH8;P23280	rs3765963	1	9034598	G	A	0.6766	0.0233	4.1e-185	0.402359	3301	Sun	843.242
Plasma	CACNA2D3	Q8IZS8	rs34084772	3	54153517	A	G	-0.2329	0.0323	5.1e-13	0.184066	3301	Sun	51.9917
Plasma	CAPN1;CAPNS1	B2RDI5;P07384;B4DWH5;P04632;A0A0C4DGQ5	rs10895987	11	64904908	T	C	-0.4591	0.050931	1.007e-18	0.225628	995	Suhre	81.2549
Plasma	CASP3	P42574	rs870825	4	185588045	G	A	-0.3955	0.0581561	1.8e-11	0.156784	995	Suhre	46.249
Plasma	CBLN1	P23435	rs10852587	16	49006458	A	T	-1.0805	0.0327	1e-200	0.143622	3301	Sun	1091.83
Plasma	CBLN4	Q9NTU7	rs74447607	20	54447947	T	C	-0.2177	0.0312	3e-12	0.191752	3301	Sun	48.6864
Plasma	CBR1	P16152	rs16993864	21	37446599	A	C	-1.2151	0.0827	6.6e-49	0.021978	3301	Sun	215.88
Plasma	CBR3	O75828;V9HW40	rs1028997	21	37532222	A	G	-0.764	0.0222	1e-200	0.375555	3301	Sun	1184.35
Plasma	CCDC126	A0A024RA08;Q96EE4	rs227934	7	23627287	T	C	-0.2749	0.0246	6.9e-29	0.47897	3301	Sun	124.876
Plasma	CCL14	Q16627	rs9903158	17	34312337	C	T	-1.0813	0.0499	3.5e-104	0.05615	3301	Sun	469.56
Plasma	CCL15	A0A0B4J2E2;Q16663	rs854624	17	34327923	T	G	-1.6912	0.039	1e-200	0.930513	3301	Sun	1880.45
Plasma	CCL16	O15467	rs112689088	17	34307457	C	T	-1.5245	0.0336	1e-200	0.097531	3301	Sun	2058.62
Plasma	CCL18	P55774	rs9904601	17	34372006	A	G	0.8634	0.0595566	2.482e-43	0.116968	996	Suhre	210.167
Plasma	CCL23	P55773	rs712048	17	34326215	C	A	0.7289	0.0353	1.6e-94	0.873722	3301	Sun	426.37
Plasma	CCL25	O15444	rs74959615	19	8121096	A	G	-0.9718	0.0428	5.2e-114	0.078294	3301	Sun	515.545
Plasma	CCL3L1	P16619	rs2015086	17	34391617	G	A	0.496	0.0364	3.1e-42	0.131452	3301	Sun	185.678
Plasma	CCL4	P13236	rs6607368	17	34819136	A	C	0.51	0.0441039	6.3e-31	0.8	3394	Folkersen	133.717
Plasma	CCL5	D0EI67;P13501	rs4239252	17	34163565	A	G	-0.3458	0.052581	7.825e-11	0.211345	996	Suhre	43.2506
Plasma	CCL8	P80075	rs3138036	17	32647544	G	A	-0.4704	0.0601323	1.326e-14	0.145436	997	Suhre	61.1955
Plasma	CCNH	P51946	rs2230641	5	86695274	G	A	-0.2386	0.0309	1.2e-14	0.205375	3301	Sun	59.6244
Plasma	CD14	P08571	rs3138074	5	140015932	A	T	0.332	0.022	9.22e-53	0.777	6861	Yao	227.736
Plasma	CD177	A0A087WVM2;Q8N6Q3	rs73554000	19	43825494	C	G	1.8032	0.0787	4.4e-116	0.023826	3301	Sun	524.975
Plasma	CD200R1	Q8TD46	rs6791672	3	112591392	A	G	-0.1759	0.0252	2.8e-12	0.590611	3301	Sun	48.7226
Plasma	CD300C	Q08708	rs62087214	17	72467626	G	A	-0.6787	0.0637	1.7e-26	0.038512	3301	Sun	113.521
Plasma	CD33	P20138;Q546G0	rs12459419	19	51728477	T	C	-0.9436	0.0209	1e-200	0.329168	3301	Sun	2038.37
Plasma	CD48	A0A087X1S7;P09326	rs12124234	1	160675269	C	G	0.2639	0.0252	1.1e-25	0.405154	3301	Sun	109.667
Plasma	CD55	P08174;B1AP13	rs11580387	1	207418408	G	A	-0.5211	0.0279	4.7e-78	0.233948	3301	Sun	348.846
Plasma	CD59	P13987;Q6FHM9	rs2273121	11	33757770	A	G	-0.362	0.027	4.7e-41	0.251594	3301	Sun	179.759
Plasma	CD5L	O43866	rs2765501	1	157804648	G	A	-0.285	0.018	4.76e-54	0.608	6861	Yao	250.694
Plasma	CDNF	Q49AH0	rs61738953	10	14862082	G	C	-0.6293	0.0681	2.5e-20	0.041783	3301	Sun	85.3928
Plasma	CDON	Q4KMG0	rs3740909	11	125889526	T	C	-0.8286	0.0779154	4.415e-25	0.0730111	993	Suhre	113.095
Plasma	CEL	B4DSX9;O75612;Q86SR3;X6R868	rs8193016	9	135917744	T	C	0.6854	0.0681	8.3e-24	0.034777	3301	Sun	101.296
Plasma	CFH	A0A024R962;P08603;A0A0D9SG88	rs2274700	1	196682947	A	G	0.3665	0.0243	1.6e-51	0.398961	3301	Sun	227.476
Plasma	CFHR5	Q9BXR6	rs35662416	1	196967354	A	G	-1.2002	0.0682	3e-69	0.030392	3301	Sun	309.698
Plasma	CFI	A8K3L0;P05156;B4DRF2;Q8WW88;G3XAM2	rs7439493	4	110656730	A	G	0.3116	0.0246	8.9e-37	0.415959	3301	Sun	160.444
Plasma	CHIT1	Q13231	rs872583	1	203184766	C	T	-1.0982	0.0247	1e-200	0.20154	3301	Sun	1976.83
Plasma	CHL1	O00533;A0A087X0M8	rs1015456	3	107776	C	T	-0.2082	0.0255	3.2e-16	0.391779	3301	Sun	66.6624
Plasma	CHRDL2	Q6WN34	rs11607100	11	74414919	T	C	-0.6419	0.0609	5.8e-26	0.041669	3301	Sun	111.096
Plasma	CHST9	Q7L1S5;A0A024RC28	rs9952639	18	24709604	C	G	0.3331	0.0263	7.2e-37	0.31788	3301	Sun	160.412
Plasma	CKM	B2R892;P06732	rs11559024	19	45821183	C	T	-0.6788	0.0844	9.1e-16	0.021509	3301	Sun	64.6843
Plasma	CLEC12A	Q5QGZ9	rs2961544	12	10136672	A	G	-1.2541	0.0132	1e-200	0.639327	3301	Sun	9026.44
Plasma	CLEC3B	E9PHK0;A0A024R2Q7;P05452	rs2056320	3	45092415	G	A	0.213	0.209	1.38e-23	0.763	6861	Yao	1.03864
Plasma	CLIC5	Q53G01;Q9NZA1;Q49AE1	rs35822882	6	45916999	T	G	-0.7339	0.0684	7.4e-27	0.033649	3301	Sun	115.123
Plasma	CLMP	B4E3S3;Q9H6B4	rs35483681	11	123045730	T	C	0.2494	0.0246	4.5e-24	0.553649	3301	Sun	102.783
Plasma	CLPS	A0A087WZW1;A0A087X0Q7;P04118	rs9380534	6	35751572	A	G	0.4476	0.0251	3.5e-71	0.602276	3301	Sun	318.004
Plasma	CNDP1	Q96KN2	rs17817077	18	72209543	A	G	0.35	0.0439797	4.72e-15	0.405528	995	Suhre	63.3331
Plasma	CNTFR	P26992	rs10972159	9	34593086	A	G	-0.6996	0.0941	1e-13	0.017903	3301	Sun	55.2739
Plasma	CNTN1	Q12860;A0A024R104	rs1838343	12	41196230	C	T	0.207	0.021	6.45e-24	0.58	6861	Yao	97.1633
Plasma	CNTN2	A0A024R9B4;Q02246;A1L3A3	rs2071533	1	205012198	G	T	-0.7705	0.0349	6.9e-108	0.865176	3301	Sun	487.41
Plasma	CNTN4	A0A024R2E5;Q8IWV2	rs163352	3	3098041	C	G	-0.3249	0.0319	2.7e-24	0.81339	3301	Sun	103.733
Plasma	CNTN5	O94779	rs1461672	11	99175378	T	C	0.734	0.0823064	2.241e-18	0.0613065	995	Suhre	79.5288
Plasma	CNTNAP2	A0A090N7T7;B2RCH4;Q9UHC6	rs10274393	7	145378588	C	G	-0.4332	0.0264	1.1e-60	0.711014	3301	Sun	269.258
Plasma	COCH	O43405	rs34907608	14	31330413	A	G	0.4759	0.0366	1e-38	0.118636	3301	Sun	169.071
Plasma	COL15A1	B3KTP7;P39059	rs41305481	9	101767385	G	A	0.2437	0.027	1.9e-19	0.301866	3301	Sun	81.4673
Plasma	COL18A1	D3DSM5;P39060;D3DSM4	rs2274809	21	46906711	G	A	0.166	0.022	1.97e-14	0.645	6861	Yao	56.9339
Plasma	COL6A1	P12109	rs434206	21	47366802	T	G	-0.2117	0.0253	5.2e-17	0.59389	3301	Sun	70.0165
Plasma	COLEC12	Q5KU26	rs2846667	18	466810	G	T	0.202	0.0296	9.3e-12	0.745476	3301	Sun	46.5714
Plasma	CP	A5PL27;P00450	rs34004251	3	148929951	T	A	-0.263	0.025	4.91e-25	0.812	6861	Yao	110.67
Plasma	CPA4	Q9UI42;A4D1M3	rs34587586	7	129938598	T	G	-1.1658	0.0154	1e-200	0.392741	3301	Sun	5730.69
Plasma	CPB1	P15086	rs13318853	3	148562399	A	G	0.2563	0.0293	2e-18	0.23152	3301	Sun	76.5177
Plasma	CPB2	A0A087WSY5;Q96IY4	rs3742264	13	46648094	T	C	0.849	0.0398274	2.806e-83	0.320603	995	Suhre	454.413
Plasma	CPM	P14384	rs1908671	12	69433404	C	G	-0.1859	0.0272	8.1e-12	0.292111	3301	Sun	46.7112
Plasma	CPNE1	B0QZ18;Q99829	rs12481228	20	34218673	C	G	-0.977	0.0379	1.8e-146	0.097658	3301	Sun	664.524
Plasma	CPXM1	Q96SM3	rs67159741	20	2780762	G	GCGCGCGCGTGCACTGTGTGTGCGCGCA	-0.6434	0.0402	1e-57	0.100249	3301	Sun	256.159
Plasma	CPZ	Q66K79	rs2631738	4	8479754	G	A	0.1949	0.0243	1e-15	0.519366	3301	Sun	64.3296
Plasma	CREB3L4	Q8TEY5	rs4845586	1	153942597	G	T	0.2556	0.0248	7.1e-25	0.46994	3301	Sun	106.223
Plasma	CREG1	O75629	rs7513428	1	167515272	C	T	-0.3111	0.0334	1.4e-20	0.836173	3301	Sun	86.7575
Plasma	CRELD1	Q96HD1;A0A024R2G1	rs7627326	3	9981734	T	G	-1.0936	0.0217	1e-200	0.23988	3301	Sun	2539.79
Plasma	CRISP2	A0A024RD74;P16562	rs478328	6	49720877	G	A	0.5695	0.0227	4.2e-139	0.454081	3301	Sun	629.413
Plasma	CRISPLD2	A0A140VK80;Q9H0B8	rs12921670	16	84838761	A	G	0.2615	0.0294	5.4e-19	0.256992	3301	Sun	79.1132
Plasma	CRP	P02741	rs2211320	1	159693605	G	A	0.149	0.02	4.77e-14	0.677	6861	Yao	55.5025
Plasma	CSF1	A0A024R0A1;P09603	rs17610659	1	110503296	T	C	0.15	0.0242805	6.5e-10	0.48	3394	Folkersen	38.1652
Plasma	CSF2RB	P32927;Q6NSJ8	rs1534881	22	37329448	A	G	-0.3158	0.0244	2.6e-38	0.445804	3301	Sun	167.511
Plasma	CSGALNACT2	A0A0S2Z5K4;Q8N6G5;A0A0S2Z5F9;A0A0S2Z5F5	rs2435349	10	43643466	G	A	-0.1961	0.0278	1.6e-12	0.272811	3301	Sun	49.7583
Plasma	CST1	P01037	rs6114248	20	23711882	A	G	0.564	0.0425541	5.048e-37	0.314573	995	Suhre	175.661
Plasma	CST2	P09228	rs6114248	20	23711882	A	G	0.5148	0.0428873	4.39e-31	0.314573	995	Suhre	144.085
Plasma	CST3	A0A0K0K1J1;P01034	rs911119	20	23612737	T	C	0.393	0.022	6.66e-73	0.779	6861	Yao	319.11
Plasma	CST5	P28325	rs6138152	20	23850130	G	A	0.7176	0.0500711	1.76e-42	0.195587	997	Suhre	205.396
Plasma	CST6	Q15828	rs3825068	11	65768093	G	A	0.5965	0.0757	3.2e-15	0.027795	3301	Sun	62.0911
Plasma	CST7	O76096	rs6138458	20	24973769	A	G	-0.7626	0.0469193	7.603e-53	0.227182	997	Suhre	264.174
Plasma	CTRB1	P17538	rs8051363	16	75255217	G	A	0.6471	0.0242	1.6e-157	0.704343	3301	Sun	715.01
Plasma	CTSB	Q5HYG5;A0A024R374;P07858;B4DMY4	rs1692819	8	11705448	A	G	0.4246	0.0274	5.2e-54	0.291825	3301	Sun	240.137
Plasma	CTSD	P07339;V9HWI3	rs111693235	11	1770224	C	G	0.35	0.0329033	2e-26	0.71	3394	Folkersen	113.151
Plasma	CTSF	Q9UBX1	rs1791679	11	66337874	A	C	0.2349	0.0269	2.5e-18	0.289477	3301	Sun	76.2538
Plasma	CTSH	P09668	rs34593439	15	79234957	A	G	-1.147	0.0346	1e-200	0.110656	3301	Sun	1098.94
Plasma	CTSS	P25774	rs41271951	1	150737220	G	A	-0.8605	0.0419	7.1e-94	0.08349	3301	Sun	421.768
Plasma	CXCL11	O14625	rs10031452	4	76924933	C	T	-0.2328	0.0245	2.4e-21	0.528726	3301	Sun	90.2888
Plasma	CXCL16	Q9H2A7	rs144830084	17	4618101	T	A	-0.2245	0.0281	1.4e-15	0.255651	3301	Sun	63.8293
Plasma	CXCL6	P80162	rs16850073	4	74703999	T	C	0.8877	0.0376405	9.66e-98	0.376524	984	Suhre	556.189
Plasma	DCBLD2	Q96PD2	rs9864010	3	98678173	A	G	-0.6199	0.0536	6.6e-31	0.054612	3301	Sun	133.756
Plasma	DEFB1	P60022	rs2738176	8	6738228	A	T	-0.3893	0.0249	5.6e-55	0.365039	3301	Sun	244.439
Plasma	DEFB104A	Q8WTQ1	rs183772362	8	7243016	T	C	0.5043	0.0718	2.1e-12	0.032572	3301	Sun	49.332
Plasma	DKK1	I1W660;O94907	rs1194673	10	54141652	A	G	0.1824	0.0261	2.8e-12	0.632462	3301	Sun	48.8392
Plasma	DKK3	Q9UBP4;F6SYF8	rs11022114	11	12038874	A	G	0.3364	0.0269	6.5e-36	0.327961	3301	Sun	156.389
Plasma	DLK1	A8K019;P80370;A0A024R6L1	rs12881760	14	101176335	C	G	0.5356	0.0251	3.5e-101	0.676353	3301	Sun	455.338
Plasma	DLL1	O00548	rs959025	6	170588654	T	C	0.1911	0.0248	1.3e-14	0.415638	3301	Sun	59.377
Plasma	DNAJC30	B3KSU4;Q96LL9	rs73702564	7	73084816	T	C	0.7183	0.0622	6.9e-31	0.038602	3301	Sun	133.362
Plasma	DPP7	Q9UHL4	rs10747049	9	140008750	C	G	0.3641	0.0277	2.3e-39	0.749544	3301	Sun	172.775
Plasma	DPT	Q07507	rs1018454	1	168697761	C	A	0.4155	0.0241	7.8e-67	0.585888	3301	Sun	297.24
Plasma	DSC2	Q02487	rs1789063	18	28673913	A	T	-0.2159	0.0293	1.8e-13	0.768825	3301	Sun	54.2963
Plasma	DSG2	Q14126	rs2704050	18	29095888	G	A	-0.1687	0.0248	9.3e-12	0.49311	3301	Sun	46.2729
Plasma	DUSP13	Q6B8I1;A0A024QZR6;Q9UII6;U3KQ82	rs6480771	10	76861680	C	T	-0.2994	0.0247	8.3e-34	0.415141	3301	Sun	146.93
Plasma	ECM1	Q16610;A0A140VJI7	rs13294	1	150484987	A	G	-0.8493	0.0351359	7.727e-102	0.39759	996	Suhre	584.28
Plasma	EDAR	Q9UNE0	rs6750059	2	109611097	C	T	-0.44	0.0490052	1.343e-18	0.248996	996	Suhre	80.6158
Plasma	EFEMP1	A0A0S2Z4F1;B2R6M6;Q12805;A0A0S2Z3V1	rs3791679	2	56096892	A	G	-0.226	0.021	2.49e-26	0.761	6861	Yao	115.819
Plasma	EGF	P01133	rs11568972	4	110889007	C	A	0.2654	0.0256	3.1e-25	0.336807	3301	Sun	107.479
Plasma	EMILIN3	Q9NT22	rs61739314	20	39990377	C	G	-0.6855	0.0691	3.6e-23	0.033292	3301	Sun	98.4144
Plasma	ENPP5	Q9UJA9;B4DHN2	rs1047153	6	46128745	T	C	-0.7891	0.0214	1e-200	0.646395	3301	Sun	1359.68
Plasma	ENPP7	Q6UWV6	rs11871061	17	77706544	C	T	0.9867	0.02	1e-200	0.359387	3301	Sun	2433.94
Plasma	ENTPD1	P49961	rs11188501	10	97600919	A	G	0.2147	0.0262	2.2e-16	0.339852	3301	Sun	67.1524
Plasma	ENTPD5	A0A024R6D3;O75356;A0A024R6B4;G3V4I0	rs57731447	14	74487521	A	G	-0.9668	0.0489	7.8e-87	0.05877	3301	Sun	390.891
Plasma	EPHB2	B4DSE0;Q4LE53;Q6NVW1;P29323	rs6687487	1	23061551	A	G	-0.6122	0.0447	1.3e-42	0.080316	3301	Sun	187.574
Plasma	ERAP1	Q9NZ08	rs17482078	5	96118866	T	C	-0.9615	0.0251	1e-200	0.216313	3301	Sun	1467.41
Plasma	ERAP2	B2R769;Q6P179	rs2927608	5	96252432	A	G	1.0523	0.0168	1e-200	0.437292	3301	Sun	3923.38
Plasma	ERLEC1	Q96DZ1;V9HWD3	rs58359565	2	53958919	A	C	-0.2076	0.0295	2.1e-12	0.218741	3301	Sun	49.5234
Plasma	ERO1B	Q86YB8	rs1254194	1	236399442	T	G	-0.3822	0.0241	1.9e-56	0.595759	3301	Sun	251.505
Plasma	ESAM	Q96AP7	rs11219769	11	124620147	T	G	-0.2351	0.0279	3.6e-17	0.264058	3301	Sun	71.0063
Plasma	ESD	A0A140VJJ2;P10768	rs8192888	13	47362384	C	G	-0.8063	0.0404	9.8e-89	0.093911	3301	Sun	398.319
Plasma	EVA1C	P58658;B3KWG0	rs6517101	21	33868483	G	T	0.1792	0.026	5.9e-12	0.331469	3301	Sun	47.5039
Plasma	F10	P00742;Q5JVE7;Q5JVE8	rs547138	13	113792170	A	T	0.2581	0.0268	5.8e-22	0.614611	3301	Sun	92.7484
Plasma	F11	P03951	rs2289252	4	187207381	T	C	0.4419	0.0415734	4.6e-25	0.412714	991	Suhre	112.984
Plasma	F7	P08709;B4DPM2;F5H8B0	rs776905	13	113781942	C	A	-1.104	0.0603047	9.164e-65	0.112838	997	Suhre	335.148
Plasma	FABP1	P07148;Q05CP7;Q6FGL7	rs2241883	2	88424066	C	T	-0.1905	0.0272	2.4e-12	0.30311	3301	Sun	49.0515
Plasma	FAH	P16930	rs11555096	15	80472526	T	C	-1.8824	0.0803	1.9e-121	0.021281	3301	Sun	549.532
Plasma	FAM151A	Q8WW52	rs11206397	1	55097068	T	A	0.2651	0.0261	2.6e-24	0.326689	3301	Sun	103.166
Plasma	FAM171B	Q6P995	rs10931256	2	187685195	C	T	-0.3336	0.0295	1.1e-29	0.216165	3301	Sun	127.882
Plasma	FAM20A	B7Z4Y3;Q8IYA5;Q96MK3;L8B8N7	rs929477	17	66655816	A	G	-0.3717	0.0417	5.1e-19	0.093705	3301	Sun	79.4535
Plasma	FAM213A	Q9BRX8	rs10887868	10	82194264	A	G	-0.1879	0.025	5.5e-14	0.412045	3301	Sun	56.4903
Plasma	FAM3B	P58499	rs73226194	21	42721869	T	C	-1.1495	0.0614	3.9e-78	0.039928	3301	Sun	350.495
Plasma	FAM3D	A0A0A8K9B4;Q96BQ1	rs3749290	3	58652292	T	G	-0.481	0.0413	2e-31	0.09578	3301	Sun	135.641
Plasma	FCER2	K3W4U1;P06734	rs12973524	19	7758263	A	G	-0.3062	0.0245	5.8e-36	0.484028	3301	Sun	156.199
Plasma	FCGR2B	P31994;P31995	rs6665610	1	161641384	A	G	1.3308	0.0224	1e-200	0.204529	3301	Sun	3529.63
Plasma	FCGR3B	O75015;M9MML6;A0A087WZR4;A0A087WU90	rs10919543	1	161508617	G	A	0.4353	0.0251	3.2e-67	0.324432	3301	Sun	300.767
Plasma	FCN1	O00602	rs11103602	9	137854872	A	G	0.5827	0.0266	1.5e-106	0.258023	3301	Sun	479.873
Plasma	FCN2	Q15485	rs57136797	9	137752540	T	A	-0.6346	0.0353	3.7e-72	0.163996	3301	Sun	323.185
Plasma	FCRL1	Q96LA6	rs4971155	1	157779182	A	T	-0.2557	0.0243	6.3e-26	0.506233	3301	Sun	110.726
Plasma	FCRL3	Q96P31	rs7528684	1	157670816	G	A	0.5253	0.0233	1.4e-112	0.465109	3301	Sun	508.28
Plasma	FCRL4	Q96PJ5	rs11582663	1	157559122	T	C	-1.1329	0.0295	1e-200	0.144281	3301	Sun	1474.82
Plasma	FCRL6	Q6DN72	rs58240276	1	159783559	T	C	-0.6094	0.0299	3.1e-92	0.190167	3301	Sun	415.396
Plasma	FETUB	Q9UGM5;E9PG08;Q5J875;B7Z8T3	rs3733159	3	186360409	G	T	0.2662	0.0435781	1.433e-09	0.312437	997	Suhre	37.3146
Plasma	FGF2	P09038	rs308403	4	123757748	T	C	-0.5896	0.0432144	5.796e-39	0.319277	996	Suhre	186.148
Plasma	FLRT2	O43155	rs17796777	14	85806774	C	A	-0.2353	0.0276	1.5e-17	0.285507	3301	Sun	72.6818
Plasma	FLRT3	Q9NZU0	rs11908097	20	14689146	C	T	0.4444	0.0278	2.5e-57	0.25127	3301	Sun	255.54
Plasma	FLT4	P35916	rs34221241	5	180057293	C	T	-0.363	0.0401	1.5e-19	0.104286	3301	Sun	81.9454
Plasma	FN1	B7ZLE5;P02751;Q6MZM7;Q9UQS6;Q6MZF4;Q6N084	rs1250258	2	216300185	C	T	-0.7113	0.0453897	1.282e-49	0.254518	996	Suhre	245.578
Plasma	FRZB	D9ZGF6;Q92765	rs288326	2	183703336	A	G	0.5655	0.0362	3.7e-55	0.12625	3301	Sun	244.033
Plasma	FSTL1	Q12841	rs1147707	3	120169248	T	C	-0.2113	0.0255	1.1e-16	0.389098	3301	Sun	68.6623
Plasma	FUT10	Q6P4F1	rs2732317	8	33330687	C	A	-0.4501	0.0242	2.5e-77	0.61158	3301	Sun	345.929
Plasma	FUT3	A8K737;P21217	rs708686	19	5840619	T	C	-0.853	0.0242	1e-200	0.274027	3301	Sun	1242.42
Plasma	FUT5	K7ENC0;Q11128	rs778809	19	5830302	A	G	-0.58	0.025	1.3e-118	0.301394	3301	Sun	538.24
Plasma	FUT8	Q546E0;Q9BYC5;A8K8P8	rs2127870	14	65796846	C	G	-1.049	0.0246	1e-200	0.784568	3301	Sun	1818.36
Plasma	GALP	Q9UBC7	rs111265125	19	56688781	C	G	0.6468	0.0907	1e-12	0.021819	3301	Sun	50.854
Plasma	GFRA1	P56159;B7Z856	rs10885877	10	117966090	G	C	0.2645	0.0272	2e-22	0.295454	3301	Sun	94.5613
Plasma	GFRA2	O00451	rs15881	8	21550768	C	A	0.2954	0.0246	4.1e-33	0.455607	3301	Sun	144.195
Plasma	GFRAL	Q6UXV0	rs72975088	6	55535375	T	A	0.2467	0.0348	1.3e-12	0.1485	3301	Sun	50.2551
Plasma	GGH	Q92820	rs10957266	8	63923764	C	T	0.7985	0.0456	1.2e-68	0.071297	3301	Sun	306.634
Plasma	GHR	P10912;A0A087X0H5;A0A087X162	rs150036324	5	42738222	C	A	0.1787	0.0263	1e-11	0.594074	3301	Sun	46.1676
Plasma	GLCE	O94923	rs11854180	15	69559340	T	G	0.8286	0.0248	1e-200	0.769146	3301	Sun	1116.31
Plasma	GLRX2	Q9NS18	rs148212596	1	193074511	G	A	1.1837	0.0881	3.5e-41	0.019804	3301	Sun	180.523
Plasma	GLTPD2	A6NH11	rs34460487	17	4685228	A	G	0.2669	0.0259	6.8e-25	0.346378	3301	Sun	106.193
Plasma	GNLY	B4E3H9;P22749	rs12151621	2	85934499	A	C	0.7736	0.0264	7.4e-189	0.227041	3301	Sun	858.668
Plasma	GNRH2	O43555	rs3787480	20	3016895	A	G	-0.2403	0.0342	2.3e-12	0.148627	3301	Sun	49.3691
Plasma	GP1BA	L7UYB8;P07359	rs72835078	17	4826592	T	G	0.3281	0.0481	9.1e-12	0.071969	3301	Sun	46.5288
Plasma	GP5	P40197	rs1466733	3	194120998	A	G	0.171	0.021	8.6e-17	0.737	6861	Yao	66.3061
Plasma	GP6	Q9HCN6	rs1654439	19	55553647	T	G	-0.6565	0.0548756	6.59e-31	0.170181	996	Suhre	143.123
Plasma	GPC1	P35052;H7C410	rs4074478	2	241446340	T	C	0.4237	0.0409	4.3e-25	0.106437	3301	Sun	107.317
Plasma	GPC5	P78333	rs2147190	13	92058888	T	C	0.3335	0.0448565	2.267e-13	0.336355	993	Suhre	55.2766
Plasma	GPC5	P78333	rs342702	13	92422946	T	G	-0.8042	0.0247	1e-200	0.274008	3301	Sun	1060.07
Plasma	GPNMB	Q14956;A0A024RA55;Q96F58	rs2268748	7	23313171	C	T	0.6868	0.0619	1.2e-28	0.0406	3301	Sun	123.106
Plasma	GPX7	Q96SL4	rs1097234	1	53063559	A	C	0.5633	0.0311	1.6e-73	0.174745	3301	Sun	328.064
Plasma	GRAMD1C	Q8IYS0;B3KUR5	rs61077924	3	113625933	G	C	0.6198	0.0239	3.4e-148	0.324013	3301	Sun	672.523
Plasma	GRN	P28799	rs5848	17	42430244	T	C	-0.2763	0.0281	8.1e-23	0.28735	3301	Sun	96.6828
Plasma	GSTA1	A0A140VJK4;P08263;B7Z1F9	rs2290758	6	52662153	A	G	0.4157	0.0237	7.2e-69	0.570024	3301	Sun	307.655
Plasma	GSTO1	P78417;V9HWG9	rs2282326	10	106020398	C	A	-0.9108	0.0204	1e-200	0.353535	3301	Sun	1993.36
Plasma	GSTP1	P09211;V9HWE9	rs1695	11	67352689	G	A	-0.1781	0.0254	2.3e-12	0.34538	3301	Sun	49.1655
Plasma	GZMM	P51124	rs16989724	19	531115	T	C	0.4303	0.0529	3.9e-16	0.935134	3301	Sun	66.1655
Plasma	H6PD	R4GMU1;O95479	rs34603401	1	9305445	C	A	0.7589	0.0317	1e-126	0.150217	3301	Sun	573.127
Plasma	HAVCR2	Q8TDQ0	rs6874178	5	156530149	T	A	-0.734	0.0286	1e-145	0.817181	3301	Sun	658.658
Plasma	HBZ	P02008	rs2461286	16	203254	G	A	-0.8846	0.0209	1e-200	0.646861	3301	Sun	1791.44
Plasma	HDHD2	Q9H0R4;V9HW73	rs75228657	18	44741063	G	A	0.7021	0.0544	4.7e-38	0.052264	3301	Sun	166.571
Plasma	HGFAC	D6RAR4;Q04756	rs1203119	4	3406952	A	G	-0.9854	0.0759241	1.095e-35	0.0824121	995	Suhre	168.448
Plasma	HP	P00738;Q6PEJ8;A0A0C4DGL8	rs217184	16	72105965	C	T	0.8688	0.0277	1e-200	0.195652	3301	Sun	983.739
Plasma	HPGDS	O60760	rs1965049	4	95266204	G	A	0.4396	0.0246	1.3e-71	0.620956	3301	Sun	319.334
Plasma	HPX	P02790;Q9BS19	rs7935957	11	6450200	A	T	-0.252	0.022	5.06e-30	0.788	6861	Yao	131.207
Plasma	HS6ST1	O60243	rs34827544	2	129084425	T	C	-0.3048	0.0348	1.9e-18	0.157293	3301	Sun	76.7134
Plasma	HSP90B1	P14625;V9HWP2	rs1165693	12	104340204	A	G	1.0974	0.0182	1e-200	0.321367	3301	Sun	3635.69
Plasma	HSPB1	P04792;V9HW43	rs13236526	7	75913642	A	G	0.36	0.0420415	1.1e-17	0.7	3394	Folkersen	73.3244
Plasma	ICAM1	P05362	rs5498	19	10395683	G	A	-1.1988	0.0136	1e-200	0.430506	3301	Sun	7769.9
Plasma	ICAM5	Q8N6I2;Q9UMF0	rs281439	19	10400110	C	G	0.8918	0.0258	1e-200	0.7804	3301	Sun	1194.8
Plasma	ICOSLG	O75144;B7Z1W8;A0N0L8	rs11558819	21	45656774	T	C	-0.5762	0.0261	3.5e-108	0.268737	3301	Sun	487.378
Plasma	IDO1	P14902	rs7010461	8	39781444	T	C	0.25	0.0271	2.5e-20	0.333882	3301	Sun	85.1023
Plasma	IDUA	P35475	rs3822020	4	985727	G	A	0.608	0.0235	7.2e-148	0.636581	3301	Sun	669.378
Plasma	IFI16	Q16666	rs72709516	1	159004851	T	C	0.8518	0.0577	2.6e-49	0.04404	3301	Sun	217.933
Plasma	IFNAR1	P17181	rs2257167	21	34715699	C	G	-0.2897	0.0363	1.4e-15	0.13427	3301	Sun	63.6918
Plasma	IGF2R	P11717	rs629849	6	160494409	G	A	0.8992	0.0331	9.5e-163	0.870653	3301	Sun	738
Plasma	IGFBP7	Q16270	rs1718849	4	57942323	C	T	-0.3626	0.0281	5.2e-38	0.766286	3301	Sun	166.511
Plasma	IGFLR1	K7EL86;Q9H665	rs12459634	19	36230174	C	T	-0.7007	0.033	5.8e-100	0.144789	3301	Sun	450.854
Plasma	IGLL1	P15814	rs139571703	22	23915620	T	C	-0.7264	0.0693	9.8e-26	0.037383	3301	Sun	109.872
Plasma	IL11RA	Q14626;Q5VZ79	rs11575578	9	34656479	A	G	0.5065	0.0479	4.4e-26	0.068486	3301	Sun	111.812
Plasma	IL12B	P29460	rs4921484	5	158769753	C	T	0.3123	0.0262	7.2e-33	0.678009	3301	Sun	142.083
Plasma	IL12RB2	B4DGA4;Q99665;A0A0A0MTN7;B7ZB60	rs12566098	1	67889571	G	C	0.2568	0.0267	6e-22	0.688055	3301	Sun	92.5055
Plasma	IL15RA	Q13261;A0A0A0MS77;G8CVM3	rs8177641	10	6016892	G	A	0.5091	0.0251	1.7e-91	0.317813	3301	Sun	411.395
Plasma	IL16	Q14005;Q9UME6	rs4778639	15	81600451	G	T	-0.6805	0.042	4.5e-59	0.09142	3301	Sun	262.517
Plasma	IL17RA	Q96F46	rs3827278	22	17595915	A	C	0.975	0.0425997	1.969e-93	0.231695	997	Suhre	523.838
Plasma	IL17RB	Q9NRM6	rs2232346	3	53892830	C	T	1.1818	0.0636	3.5e-77	0.036587	3301	Sun	345.282
Plasma	IL17RD	Q8NFM7;B4DXM5	rs6776722	3	57142659	A	G	-0.4623	0.0254	3.4e-74	0.695339	3301	Sun	331.269
Plasma	IL18	A0A024R3E0;Q14116	rs75649625	11	112052194	G	A	0.29	0.0303917	1.4e-21	0.76	3394	Folkersen	91.0512
Plasma	IL18R1	Q13478;B7ZKV7	rs1420106	2	103035044	G	A	-0.9085	0.0257	1e-200	0.775551	3301	Sun	1249.64
Plasma	IL18RAP	O95256	rs6543140	2	103074274	T	G	0.4854	0.0460236	1.013e-24	0.301308	994	Suhre	111.234
Plasma	IL1R2	P27930	rs7561460	2	102617204	C	T	-0.4025	0.0242	6.2e-62	0.395872	3301	Sun	276.631
Plasma	IL1RAP	A8K6K4;Q9NPH3	rs6444442	3	190346060	G	A	-1.352	0.0246	1e-200	0.841013	3301	Sun	3020.53
Plasma	IL1RL2	Q9HB29	rs2228139	2	102781649	G	C	-0.4249	0.0484	1.6e-18	0.069221	3301	Sun	77.0695
Plasma	IL1RN	P18510;A0A024R528	rs6761276	2	113832312	C	T	-0.1907	0.0248	1.5e-14	0.577697	3301	Sun	59.1287
Plasma	IL23R	Q5VWK5	rs11581607	1	67707690	A	G	-0.42	0.0491	1.2e-17	0.066948	3301	Sun	73.1704
Plasma	IL27RA	Q6UWB1	rs35026308	19	14153293	C	T	-0.9457	0.0286	1e-200	0.176436	3301	Sun	1093.39
Plasma	IL5RA	A0A024R2C8;Q01344;Q8NHV7	rs77400868	3	3150964	G	A	0.5096	0.0362	6.8e-45	0.13908	3301	Sun	198.172
Plasma	IL6ST	A0A0A0N0L2;P40189;Q17RA0	rs11574765	5	55278967	G	A	0.3809	0.0388	1e-22	0.115654	3301	Sun	96.3737
Plasma	IL7R	P16871	rs11957503	5	35883176	G	T	0.4248	0.0436443	1.922e-21	0.437249	996	Suhre	94.7357
Plasma	ISG15	P05161	rs1891906	1	950243	C	A	0.2592	0.0253	1.4e-24	0.385856	3301	Sun	104.961
Plasma	ISLR2	Q6UXK2	rs2959011	15	74611781	T	A	0.198	0.0261	3.2e-14	0.34226	3301	Sun	57.5505
Plasma	ITIH5	G5E9D8;Q86UX2;Q96JW9;C9J2H1;A0A096LP62	rs7909223	10	7700709	G	A	0.3222	0.0286	2e-29	0.747691	3301	Sun	126.917
Plasma	KDELC2	A0A024R3C4;Q7Z4H8	rs74911261	11	108357137	A	G	-1.3136	0.0745	1.1e-69	0.026545	3301	Sun	310.895
Plasma	KDR	A0A024RD88;P35968	rs34231037	4	55972946	G	A	-1.1531	0.0649	1e-70	0.033769	3301	Sun	315.678
Plasma	KIAA1161	Q6NSJ0	rs10972076	9	34356359	T	C	0.3082	0.0252	2.2e-34	0.624659	3301	Sun	149.577
Plasma	KLK7	P49862;B4DHX9;A0A024R4H6	rs2739419	19	51484562	G	A	0.7031	0.0408	1.1e-66	0.908316	3301	Sun	296.971
Plasma	KLK8	A0A0A0MQY9;O60259	rs74705037	19	51504808	A	G	0.9287	0.0579	6.3e-58	0.044509	3301	Sun	257.273
Plasma	KNG1	P01042	rs2304456	3	186445052	G	T	-1.366	0.0581784	2.888e-97	0.102912	996	Suhre	551.288
Plasma	KYAT3	B4DW13;Q6YP21	rs9787133	1	89382664	G	C	-0.1716	0.0246	2.9e-12	0.493516	3301	Sun	48.6591
Plasma	LAMC2	Q13753	rs2276543	1	183155305	A	G	0.6155	0.0251	4.4e-133	0.279009	3301	Sun	601.324
Plasma	LCT	P09848	rs4988235	2	136608646	A	G	0.7759	0.0244	1e-200	0.711217	3301	Sun	1011.19
Plasma	LEPR	P48357;Q4G138	rs3790438	1	66085525	A	T	-1.3745	0.0219	1e-200	0.175255	3301	Sun	3939.14
Plasma	LGALS2	P05162	rs5756729	22	37961353	T	C	-0.275	0.0259	2.2e-26	0.592511	3301	Sun	112.737
Plasma	LGALS3	A0A024R693;P17931	rs9323280	14	55801687	A	C	0.77	0.0463489	5.6e-62	0.87	3394	Folkersen	275.996
Plasma	LHB	A0A0F7RQE6;P01229	rs75287599	19	49517140	T	C	-0.4342	0.0458	2.4e-21	0.077817	3301	Sun	89.877
Plasma	LILRA4	P59901	rs2241384	19	54849942	A	G	-0.3088	0.0327	3.4e-21	0.170417	3301	Sun	89.1783
Plasma	LILRA5	A6NI73	rs759819	19	54815577	C	T	-0.5429	0.0242	2.5e-111	0.330491	3301	Sun	503.279
Plasma	LILRA6	Q6PI73	rs35361042	19	54748737	G	C	1.3399	0.0376	1e-200	0.091124	3301	Sun	1269.9
Plasma	LILRB1	A0A087WSV6;Q8NHL6;A0A087WSX8;D9IDM5;A8MVE2;A0A0B4J1W1	rs2114511	19	55145093	C	G	-1.8056	0.046	1e-200	0.051234	3301	Sun	1540.73
Plasma	LILRB2	Q8N423	rs386056	19	54782919	T	C	-1.1495	0.0233	1e-200	0.201121	3301	Sun	2433.92
Plasma	LILRB5	O75023	rs12975366	19	54759361	C	T	-1.1607	0.0152	1e-200	0.405252	3301	Sun	5831.13
Plasma	LIPN	Q5VXI9	rs10509554	10	90525792	T	C	1.0165	0.0213	1e-200	0.306794	3301	Sun	2277.49
Plasma	LMAN2L	Q9H0V9;B4DI83;B4E308;B4DVH1	rs2271893	2	97405440	A	G	0.2628	0.026	4.4e-24	0.322912	3301	Sun	102.165
Plasma	LMNB1	B4DZT3;P20700	rs36105360	5	126161690	T	C	0.8039	0.0789	2.2e-24	0.025189	3301	Sun	103.813
Plasma	LPA	P08519	rs55730499	6	161005610	C	T	-1.255	0.046	3.77e-167	0.939	6861	Yao	744.341
Plasma	LRIG3	Q6UXM1;C9K080	rs11172791	12	59272973	C	T	-0.4624	0.0613	4.8e-14	0.04525	3301	Sun	56.9003
Plasma	LRPAP1	P30533	rs78770234	4	3496683	A	G	-0.6821	0.0688	3.6e-23	0.032618	3301	Sun	98.2922
Plasma	LRRC15	Q8TF66;B3KWI4	rs57514363	3	194087927	G	T	0.5927	0.0383	5.9e-54	0.112882	3301	Sun	239.482
Plasma	LRRN1	Q6UXK5;A8K6Q2	rs6801789	3	3807592	C	T	0.246	0.0253	2.3e-22	0.354026	3301	Sun	94.543
Plasma	LY9	A0A0C4DFU4;Q9HBG7;Q05CA2;Q0VAI0;Q5VYH9	rs540254	1	160767737	C	T	0.4173	0.0448028	7.783e-20	0.353266	995	Suhre	86.7533
Plasma	MAN2B2	B7Z754;E9PCD7;Q9Y2E5	rs2301790	4	6600012	G	A	0.3342	0.0238	1e-44	0.483846	3301	Sun	197.178
Plasma	MANBA	O00462	rs227370	4	103612043	C	T	-0.5596	0.0248	7.8e-113	0.674618	3301	Sun	509.157
Plasma	MANEA	Q5SRI9	rs80268500	6	96009498	C	T	-1.6814	0.0345	1e-200	0.081945	3301	Sun	2375.22
Plasma	MANSC1	Q9H8J5	rs2160588	12	12487447	A	G	0.5024	0.0371	8.7e-42	0.119697	3301	Sun	183.38
Plasma	MANSC4	A6NHS7	rs36138811	12	27927881	C	T	0.6369	0.0277	7.4e-117	0.231771	3301	Sun	528.668
Plasma	MAPK13	A0A024RD04;O15264	rs12210904	6	36098191	A	C	0.2538	0.0266	1.5e-21	0.289473	3301	Sun	91.0374
Plasma	MAPKAPK2	P49137	rs6669284	1	206890435	A	G	0.3261	0.0443227	3.902e-13	0.349398	996	Suhre	54.1314
Plasma	MATN4	A2RRP8;B3KQB2;A5D8U1;O95460;A6NNA4	rs11697677	20	43925554	G	A	-0.2298	0.028	2.5e-16	0.253541	3301	Sun	67.3572
Plasma	MBL2	P11226	rs7899547	10	54536839	G	T	0.9477	0.0202	1e-200	0.65277	3301	Sun	2201.1
Plasma	MCAM	A0A024R3I5;P43121	rs11217234	11	119177938	A	G	-0.144	0.026	4.32e-08	0.718	6861	Yao	30.6746
Plasma	MFAP2	P55001;A0A024RA94	rs4920605	1	17315425	A	G	0.2073	0.0243	1.3e-17	0.553544	3301	Sun	72.7756
Plasma	MFGE8	Q08431;X6R3G6;B4E396;F5GZN3;B3KTQ2	rs1961839	15	89467454	A	G	-0.2253	0.0252	3.4e-19	0.397423	3301	Sun	79.9321
Plasma	MGAT2	Q10469	rs28396798	14	50075319	T	C	0.1949	0.0244	1.3e-15	0.54747	3301	Sun	63.8034
Plasma	MGAT4B	Q9UQ53	rs73351608	5	179232064	T	A	-0.9586	0.0852	2.2e-29	0.021516	3301	Sun	126.589
Plasma	MGP	A0A024RAX0;P08493	rs7135211	12	15052758	G	A	0.265	0.019	3.62e-44	0.622	6861	Yao	194.529
Plasma	MIA	A0A024R0P1;Q16674	rs2604877	19	41275048	C	T	1.4417	0.0424	1e-200	0.068031	3301	Sun	1156.16
Plasma	MMP1	B4DN15;P03956;Q53G95	rs471994	11	102697731	G	A	0.32	0.0257852	2.3e-35	0.65	3394	Folkersen	154.014
Plasma	MMP10	P09238	rs17860955	11	102649482	C	T	-0.8693	0.0869	1.4e-23	0.021509	3301	Sun	100.069
Plasma	MMP12	P39900	rs28381684	11	102737192	T	A	-0.7789	0.0348	5.1e-111	0.124644	3301	Sun	500.962
Plasma	MMP7	P09237	rs11568819	11	102401633	A	G	0.6681	0.0876491	5.837e-14	0.0669014	994	Suhre	58.1016
Plasma	MMP8	B4E0I2;P22894	rs35231465	11	102584135	A	G	-0.583	0.061	2.26e-21	0.023	6861	Yao	91.3435
Plasma	MMP9	P14780	rs2250889	20	44642406	C	G	-0.6221	0.0585	2.1e-26	0.953378	3301	Sun	113.086
Plasma	MPO	P05164	rs34097845	17	56358429	T	C	-0.5736	0.0497	8.5e-31	0.067304	3301	Sun	133.2
Plasma	MRC2	Q9UBG0	rs146385050	17	60637258	A	C	-0.2188	0.0323	1.3e-11	0.195049	3301	Sun	45.887
Plasma	MSMB	P08118	rs10993994	10	51549496	C	T	0.9821	0.0189	1e-200	0.59627	3301	Sun	2700.15
Plasma	MTHFS	P49914	rs7173566	15	80211691	C	T	-0.2126	0.0263	6e-16	0.342884	3301	Sun	65.3454
Plasma	MTRF1L	Q9UGC7;B4DMX1	rs503366	6	153333550	C	T	0.1652	0.0243	1.1e-11	0.497366	3301	Sun	46.2176
Plasma	MXRA7	P84157;Q6ZR64	rs9900613	17	74674857	T	C	-0.229	0.0247	1.9e-20	0.430519	3301	Sun	85.9562
Plasma	NAAA	Q02083	rs9996608	4	76848231	T	C	-0.5485	0.0257	3.9e-101	0.300448	3301	Sun	455.499
Plasma	NAGK	C9JEV6;Q9UJ70	rs7606102	2	71276399	G	A	-0.432	0.0331	6e-39	0.170314	3301	Sun	170.338
Plasma	NAGPA	Q9UK23	rs12599777	16	5079466	G	A	-0.4178	0.0317	1.4e-39	0.204198	3301	Sun	173.707
Plasma	NCAM1	P13591;A0A087WWD4	rs11214489	11	112975934	C	T	0.368	0.024	3.01e-54	0.818	6861	Yao	235.111
Plasma	NELL1	B3KXR2;J3KNC5;K9UUD5;Q92832;F5H6I3	rs61652119	11	20955270	A	G	1.1098	0.0553	1.3e-89	0.048674	3301	Sun	402.753
Plasma	NEO1	Q59FP8;Q92859	rs12903656	15	73326961	C	G	0.2861	0.0415	5.5e-12	0.10075	3301	Sun	47.5269
Plasma	NFASC	O94856;B4DRH7	rs6667532	1	204948659	G	A	0.8226	0.0387	4.1e-100	0.10515	3301	Sun	451.81
Plasma	NID2	Q14112	rs1151582	14	52482768	T	C	-0.3942	0.0233	2.6e-64	0.456621	3301	Sun	286.234
Plasma	NMRAL1	Q9HBL8	rs11557236	16	4519439	A	G	-0.4905	0.0443	1.5e-28	0.082096	3301	Sun	122.594
Plasma	NOG	Q13253	rs79084672	17	54856140	G	A	1.2369	0.1154	8.7e-27	0.011867	3301	Sun	114.883
Plasma	NOV	A0A024R9J4;P48745	rs58936256	8	120422799	C	T	0.2085	0.0301	4.2e-12	0.215178	3301	Sun	47.9821
Plasma	NPPB	P16860	rs198379	1	11915467	T	C	-0.266	0.024	1.58e-41	0.608	6861	Yao	122.84
Plasma	NPTX1	Q15818	rs62069681	17	78624702	C	T	0.514	0.0417	7.6e-35	0.09319	3301	Sun	151.934
Plasma	NPW	Q8N729	rs35327014	16	2076202	G	A	-0.4266	0.0288	1.6e-49	0.231175	3301	Sun	219.41
Plasma	NQO1	P15559;B4DLR8	rs77944668	16	69718112	A	G	-0.7498	0.0283	1.6e-154	0.19326	3301	Sun	701.969
Plasma	NRP1	O14786;Q68DN3;A8K9V7;Q59F20;Q6X907;Q6AWA9	rs2506149	10	33480713	T	C	-0.2805	0.0256	6.9e-28	0.358077	3301	Sun	120.057
Plasma	NRP2	O60462;Q7LBX6;Q7Z3T9;X5D2Q8;A0A024R412;A0A024R3W6	rs16837641	2	206634869	A	G	0.2094	0.0271	1.1e-14	0.321865	3301	Sun	59.7056
Plasma	NT5C	Q8TCD5;V9HWF3	rs78625720	17	73140941	A	G	-0.7529	0.0719	1.2e-25	0.029536	3301	Sun	109.652
Plasma	NTN1	O95631	rs72809988	17	8986397	A	G	-0.5788	0.038	1.6e-52	0.110474	3301	Sun	232.001
Plasma	NTN4	A8K3H6;B2RE43;Q9HB63	rs17288108	12	96131895	G	A	-0.2779	0.0323	7.2e-18	0.181915	3301	Sun	74.0239
Plasma	NTNG1	Q5IEC3;Q5IEC8;Q9Y2I2;X5DNW2;B4DKF0	rs115668827	1	107678268	C	G	1.0036	0.0565	1.1e-70	0.048772	3301	Sun	315.518
Plasma	NUDT12	B4E1W3;E7EM93;Q9BQG2	rs74692061	5	102903643	G	A	-0.3756	0.0341	2.8e-28	0.156975	3301	Sun	121.323
Plasma	NUDT9	Q96KB3;Q9BW91;A0A024RDI6;Q8NG26	rs28696943	4	88310135	G	A	-0.3571	0.0323	2.3e-28	0.166852	3301	Sun	122.229
Plasma	OAF	Q86UD1	rs117554512	11	120098329	T	C	0.6816	0.0431	2.1e-56	0.086262	3301	Sun	250.095
Plasma	OAS1	P00973;F8VXY3	rs4767027	12	113359157	C	T	-0.2701	0.0256	6.2e-26	0.653837	3301	Sun	111.319
Plasma	OBP2B	Q9NPH6	rs4454354	9	136089529	C	T	0.358	0.0298	2.7e-33	0.786126	3301	Sun	144.322
Plasma	ORM1	P02763	rs116994374	9	117084672	G	A	-0.409	0.054	2.55e-14	0.94	6861	Yao	57.3666
Plasma	OSMR	Q99650	rs357253	5	38907422	T	C	0.2089	0.0292	8.3e-13	0.231854	3301	Sun	51.1813
Plasma	PAM	P19021;O43832	rs257309	5	102418604	G	A	-0.4664	0.0248	3.8e-79	0.351714	3301	Sun	353.683
Plasma	PATE4	P0C8F1	rs875500	11	125698654	A	T	-0.4819	0.0262	1e-75	0.719869	3301	Sun	338.307
Plasma	PCOLCE	Q15113	rs9801017	7	100236202	A	G	0.2113	0.0254	1e-16	0.635533	3301	Sun	69.2041
Plasma	PCOLCE2	Q9UKZ9	rs34516933	3	142603861	A	T	0.422	0.0246	5.4e-66	0.356379	3301	Sun	294.276
Plasma	PCSK1	P29120	rs6234	5	95728974	C	G	-1.0975	0.0209	1e-200	0.260198	3301	Sun	2757.51
Plasma	PDCD1LG2	Q9BQ51	rs16923189	9	5510644	G	A	0.3879	0.0259	7.9e-51	0.297639	3301	Sun	224.306
Plasma	PDCD5	O14737	rs4499344	19	33073431	A	G	0.354	0.0269	1.2e-39	0.291128	3301	Sun	173.182
Plasma	PDE5A	O76074;G5E9C5	rs4834770	4	120241849	A	G	-0.314	0.0446174	3.633e-12	0.434171	995	Suhre	49.5281
Plasma	PDGFD	Q9GZP0	rs7950273	11	104031598	G	C	-0.2749	0.0269	1.4e-24	0.287969	3301	Sun	104.435
Plasma	PDGFRB	P09619;Q59F04	rs2304058	5	149508544	G	C	0.9308	0.0203	1e-200	0.556673	3301	Sun	2102.43
Plasma	PDIA5	Q14554	rs2278668	3	122835232	C	T	-0.5216	0.0234	4e-110	0.593477	3301	Sun	496.871
Plasma	PEAR1	Q5VY43	rs12137505	1	156883546	G	A	-0.2226	0.0251	8.1e-19	0.406496	3301	Sun	78.6508
Plasma	PENK	A0A024R7V4;P01210	rs2670014	8	57376781	T	C	-0.4653	0.0234	1.3e-87	0.473963	3301	Sun	395.398
Plasma	PF4V1	P10720	rs941758	4	74718941	A	C	-0.4937	0.0253	6.6e-85	0.708177	3301	Sun	380.79
Plasma	PGLYRP1	O75594	rs8102493	19	46530389	C	T	-0.2168	0.0259	5.1e-17	0.333381	3301	Sun	70.0679
Plasma	PGM1	B7Z6C2;P36871;B4DDQ8	rs1126728	1	64097432	T	C	0.2869	0.0289	2.8e-23	0.227841	3301	Sun	98.552
Plasma	PI3	P19957	rs16989763	20	43779963	C	T	0.3756	0.0302	1.6e-35	0.195049	3301	Sun	154.681
Plasma	PIANP	Q8IYJ0	rs11064321	12	6809896	C	G	0.2262	0.027	5e-17	0.397321	3301	Sun	70.1872
Plasma	PIGR	P01833	rs2007272	1	207113755	C	G	-0.205	0.0248	1.4e-16	0.425661	3301	Sun	68.3289
Plasma	PLA2G2A	A0A024RA96;P14555	rs11573156	1	20306146	C	G	1.0205	0.0243	1e-200	0.231634	3301	Sun	1763.65
Plasma	PLA2R1	Q13018;B7ZML4	rs3749117	2	160885442	C	T	-0.9021	0.0188	1e-200	0.501272	3301	Sun	2302.47
Plasma	PLAU	P00749;Q59GZ8;B4DNJ4;A0A024QZM9	rs2227551	10	75669190	T	G	-0.2435	0.0266	5.4e-20	0.716116	3301	Sun	83.7982
Plasma	PLEKHA7	E9PKC0;Q6IQ23	rs382280	11	16857799	T	C	0.2767	0.04	4.8e-12	0.121245	3301	Sun	47.8518
Plasma	PLG	P00747;Q5TEH5	rs783150	6	161226939	T	C	-0.5174	0.0656689	8.7e-15	0.113568	995	Suhre	62.0773
Plasma	PLXNB2	O15031	rs28573806	22	50727792	C	T	0.5315	0.0232	3.5e-116	0.399591	3301	Sun	524.844
Plasma	PLXNC1	O60486	rs115651556	12	94613898	A	G	-2.1447	0.1008	2.1e-100	0.013723	3301	Sun	452.702
Plasma	PLXNC1	O60486	rs7972001	12	94623502	T	C	-1.005	0.122632	7.773e-16	0.0337361	993	Suhre	67.1621
Plasma	POFUT1	Q9H488	rs76143353	20	30815755	T	C	-0.8	0.0499	9.3e-58	0.059564	3301	Sun	257.027
Plasma	POGLUT1	Q8NBL1;B4DJ97	rs75203710	3	119121679	C	T	0.3935	0.0483	3.8e-16	0.070387	3301	Sun	66.3736
Plasma	POMGNT2	A0A024R2P4;Q8NAT1	rs729654	3	43147652	T	C	-0.2561	0.0239	9.3e-27	0.473213	3301	Sun	114.822
Plasma	PPA1	Q15181;V9HWB5	rs10823500	10	72005190	G	A	0.4013	0.0447665	1.525e-18	0.370854	995	Suhre	80.3584
Plasma	PPID	E5KN55;Q08752	rs8396	4	159630817	C	T	0.5011	0.0459752	3.395e-26	0.286437	988	Suhre	118.796
Plasma	PPIE	Q9UNP9;B3KSZ1	rs12086750	1	40210468	C	G	-0.3832	0.025	4.8e-53	0.370624	3301	Sun	234.948
Plasma	PPIL1	A0A024RCX8;Q9Y3C6	rs12194408	6	36839598	G	C	-1.106	0.0705	1.9e-55	0.030241	3301	Sun	246.112
Plasma	PPP3CA;PPP3R1	A0A0S2Z4C6;Q08209;A0A0S2Z4B5;P63098	rs17266357	4	102721809	C	T	0.3681	0.0450047	8.67e-16	0.30993	997	Suhre	66.8985
Plasma	PPT1	P50897	rs7533094	1	40559686	A	G	-0.8621	0.0603	2.3e-46	0.041979	3301	Sun	204.4
Plasma	PRCP	B7Z7Q6;P42785;A0A024R5L0	rs2229437	11	82564294	G	T	0.291	0.0315	2.8e-20	0.180887	3301	Sun	85.3424
Plasma	PRSS22	Q9GZN4	rs3810801	16	2892370	A	C	0.3066	0.0256	3.7e-33	0.332823	3301	Sun	143.438
Plasma	PRTN3	P24158	rs10425544	19	836043	C	T	0.5991	0.0269	8.3e-110	0.712816	3301	Sun	496.014
Plasma	PSAPL1	Q6NUJ1	rs10023470	4	7434456	G	A	0.5481	0.0307	2.6e-71	0.184308	3301	Sun	318.745
Plasma	PSG3	Q16557	rs2355433	19	43679088	G	A	-0.6523	0.0239	1.6e-163	0.547653	3301	Sun	744.902
Plasma	PSG4	B3KQL2;Q96QL5;Q6P520;Q00888	rs1138888	19	43696022	A	T	-0.666	0.0245	5.4e-163	0.624394	3301	Sun	738.952
Plasma	PTGDS	A0A024R8G3;P41222	rs7019538	9	139861470	C	T	0.1979	0.0246	7.8e-16	0.524107	3301	Sun	64.7174
Plasma	PTGFRN	Q9P2B2	rs4233450	1	117490261	T	G	1.0007	0.0283	1e-200	0.829141	3301	Sun	1250.36
Plasma	PTHLH	P12272;Q53XY9;A0A024RB29	rs10843115	12	28307717	T	C	0.1862	0.0276	1.4e-11	0.271368	3301	Sun	45.5136
Plasma	PTN	A0A024R778;P21246	rs1431093	7	137016297	A	C	0.2196	0.0248	7.9e-19	0.419185	3301	Sun	78.4082
Plasma	QDPR	A0A140VKA9;P09417	rs28719835	4	17520066	T	C	-0.5668	0.0275	1e-94	0.242578	3301	Sun	424.81
Plasma	QPCTL	Q9NXS2	rs17850756	19	46206262	A	G	-0.2881	0.026	1.6e-28	0.327901	3301	Sun	122.783
Plasma	QSOX1	A0A140VKE5;O00391;Q13876	rs12371	1	180163390	G	A	0.6995	0.0426	1.3e-60	0.089018	3301	Sun	269.623
Plasma	QSOX2	Q6ZRP7	rs10858248	9	139108324	G	A	-0.3568	0.0239	1.5e-50	0.502175	3301	Sun	222.871
Plasma	RARRES1	P49788	rs61696028	3	158455703	C	A	1.3366	0.0266	1e-200	0.146047	3301	Sun	2524.87
Plasma	RARRES2	A0A090N7U9;Q99969	rs9640161	7	150045910	A	C	0.3473	0.0417713	3.049e-16	0.370821	987	Suhre	69.1279
Plasma	REG1A	A8K7G6;P05451	rs11126696	2	79323888	G	A	0.265	0.021	2.18e-40	0.612	6861	Yao	159.24
Plasma	REG4	A0A024R0M1;Q9BYZ8	rs79795228	1	120359286	A	C	0.7938	0.0995	1.4e-15	0.015404	3301	Sun	63.6467
Plasma	RELT	A0A024R5N3;Q969Z4	rs7952686	11	73128503	T	C	0.4125	0.0292	3.1e-45	0.204256	3301	Sun	199.564
Plasma	RET	P07949;Q9BTX6;A0A024R7T2	rs2795507	10	43352894	C	T	-0.2768	0.0305	1.1e-19	0.796047	3301	Sun	82.3631
Plasma	RETN	Q9HD89	rs34124816	19	7733676	C	A	-0.6083	0.0645	4.4e-21	0.037632	3301	Sun	88.9439
Plasma	RFESD	Q8TAC1;A0A024RAR3	rs77881626	5	95017852	G	T	-0.5972	0.0573	2.1e-25	0.04763	3301	Sun	108.625
Plasma	RGMA	A0A0A0MTQ4;Q96B86	rs3752102	15	93616014	A	C	-0.2012	0.0245	2.5e-16	0.473455	3301	Sun	67.441
Plasma	RGMB	J3KNF6;Q6NW40	rs1563317	5	97768486	G	A	0.2161	0.0245	1.2e-18	0.552752	3301	Sun	77.7996
Plasma	RIDA	A0A024R9H2;P52758	rs1462977	8	99115359	G	A	-0.3387	0.0258	2.2e-39	0.322718	3301	Sun	172.342
Plasma	RMDN1	Q6N086;Q96DB5;E5RH53	rs11781016	8	87529297	C	A	0.3167	0.0243	8.3e-39	0.489299	3301	Sun	169.857
Plasma	RNASE1	P07998;W0UV93	rs17254387	14	21280678	A	G	0.2302	0.0273	3e-17	0.687505	3301	Sun	71.1026
Plasma	RNASE2	P10153;W0UV60	rs56204594	14	21433367	C	A	0.2366	0.0244	3.2e-22	0.464292	3301	Sun	94.0264
Plasma	RNASE4	P34096;Q53XB4	rs12588573	14	21146584	T	C	-0.4494	0.0291	8.9e-54	0.224438	3301	Sun	238.495
Plasma	RNASE6	Q6IB39;Q93091	rs11622942	14	21250846	T	G	0.9971	0.0236	1e-200	0.233384	3301	Sun	1785.06
Plasma	ROR1	Q01973	rs1408416	1	64614495	T	G	-0.44	0.033	1.8e-40	0.161988	3301	Sun	177.778
Plasma	RPN1	P04843	rs2712417	3	128345179	G	A	-0.3447	0.0247	3.1e-44	0.618031	3301	Sun	194.755
Plasma	RRM2B	Q7LG56	rs74589258	8	103215228	G	A	0.3254	0.0479	1.1e-11	0.07035	3301	Sun	46.1492
Plasma	RSPO3	Q9BXY4	rs2489623	6	127455821	C	A	0.27	0.0245	3.6e-28	0.534679	3301	Sun	121.449
Plasma	RTN4R	Q9BZR6	rs75766	22	20174853	A	C	-0.3498	0.0283	4.8e-35	0.748115	3301	Sun	152.78
Plasma	S100A4	P26447	rs58056804	1	153524706	A	G	0.5046	0.0565	4.5e-19	0.049682	3301	Sun	79.7623
Plasma	SCARF1	A8K6Z5;Q14162	rs8071756	17	1574342	G	A	0.5897	0.0494265	9.358e-31	0.223671	997	Suhre	142.345
Plasma	SCARF2	A0A096LNX8;Q96GP6	rs738086	22	20775556	T	G	0.2997	0.0318	4.8e-21	0.811314	3301	Sun	88.8217
Plasma	SCG3	Q8WXD2	rs1378892	15	51964865	C	T	0.486	0.0277	1e-68	0.763554	3301	Sun	307.831
Plasma	SECTM1	Q8WVN6	rs4789763	17	80289284	G	A	0.2805	0.0246	3.8e-30	0.492828	3301	Sun	130.016
Plasma	SELL	A0A024R8Z0;P14151	rs4987358	1	169665551	T	G	-0.5165	0.0261	6.8e-87	0.27377	3301	Sun	391.615
Plasma	SELP	A0A024R8Y9;P16109;Q6NUL9;Q5R341	rs6136	1	169563951	G	T	-0.8073	0.0371	3e-105	0.107874	3301	Sun	473.502
Plasma	SEMA3C	B4E2I9;Q99985	rs1019016	7	80570562	T	G	0.1751	0.0248	1.6e-12	0.581376	3301	Sun	49.8504
Plasma	SEMA3E	O15041	rs3757607	7	83034362	C	G	-1.1204	0.0323	1e-200	0.12244	3301	Sun	1203.21
Plasma	SEMA3G	Q9NS98	rs2016575	3	52477080	C	T	-0.2687	0.0316	1.9e-17	0.815652	3301	Sun	72.3038
Plasma	SEMA5A	Q13591;X5DR95	rs17329170	5	9547242	A	G	1.432	0.0324	1e-200	0.100634	3301	Sun	1953.42
Plasma	SERPINA1	E9KL23;P01009	rs2749534	14	94809760	G	A	0.4267	0.0537626	5.551e-15	0.201103	997	Suhre	62.9918
Plasma	SERPINA3	A0A024R6P0;P01011	rs6575449	14	95097303	T	C	-0.4323	0.0535108	1.903e-15	0.18593	995	Suhre	65.266
Plasma	SERPINA4	P29622;A0A024R6I9	rs10135681	14	95007744	C	T	0.2771	0.0422102	8.416e-11	0.395186	997	Suhre	43.0961
Plasma	SERPINA4	P29622;A0A024R6I9	rs10139745	14	95035374	A	G	0.6166	0.0277	4.9e-110	0.221432	3301	Sun	495.504
Plasma	SERPINE2	A0A024R498;P07093;A0A024R451	rs68066031	2	224880498	C	T	-0.4261	0.0297	1.1e-46	0.258001	3301	Sun	205.831
Plasma	SERPINF1	A0A140VKF3;P36955	rs62088172	17	1666253	T	C	-0.4449	0.0251	1.8e-70	0.344526	3301	Sun	314.179
Plasma	SERPINF2	P08697	rs11657394	17	1636950	A	C	-0.3459	0.0479	5.4e-13	0.077401	3301	Sun	52.1471
Plasma	SIGLEC12	Q96PQ1	rs3826667	19	52004074	T	C	-1.127	0.0275	1e-200	0.835439	3301	Sun	1679.51
Plasma	SIGLEC14	Q08ET2	rs1106476	19	52130637	A	T	-1.1918	0.0317	1e-200	0.116912	3301	Sun	1413.48
Plasma	SIGLEC6	O43699;A0A024R4K4	rs2124910	19	52025247	T	C	0.653	0.0433631	2.748e-46	0.407351	993	Suhre	226.77
Plasma	SIGLEC7	Q9Y286	rs140185670	19	51646140	C	G	-0.6089	0.0482	1.7e-36	0.07999	3301	Sun	159.587
Plasma	SIGLEC9	Q9Y336	rs2075803	19	51628529	G	A	-1.2255	0.0123	1e-200	0.55088	3301	Sun	9926.96
Plasma	SIRPA	P78324	rs6136377	20	1896288	G	A	-1.2106	0.0153	1e-200	0.368754	3301	Sun	6260.64
Plasma	SIRPB1	O00241;Q5TFQ8;H9KV29	rs3848788	20	1543066	A	G	0.7453	0.0239	1e-200	0.304983	3301	Sun	972.448
Plasma	SIRPG	Q9P1W8	rs6043409	20	1616206	G	A	0.2628	0.0261	8.1e-24	0.652477	3301	Sun	101.384
Plasma	SLAMF7	Q9NQ25;B4DVL7;B4DW98	rs11581248	1	160720074	T	C	-1.2597	0.0295	1e-200	0.142448	3301	Sun	1823.43
Plasma	SMOC1	Q9H4F8;A0A024R6E0	rs1958078	14	70354858	C	A	0.3765	0.0328	1.8e-30	0.833946	3301	Sun	131.76
Plasma	SNCA	P37840;H6UYS5	rs2245801	4	90757840	C	T	-0.2507	0.0303	1.2e-16	0.788276	3301	Sun	68.4579
Plasma	SPARCL1	A0A024RDE1;Q14515;B7ZB68;Q8N4S1	rs7681694	4	88462729	A	G	0.5315	0.0244	2.7e-105	0.3366	3301	Sun	474.49
Plasma	SPARCL1	A0A024RDE1;Q14515;B7ZB68;Q8N4S1	rs1462372	4	88478750	C	T	0.3214	0.0461997	6.309e-12	0.327482	997	Suhre	48.3964
Plasma	SPATA20	Q8TB22	rs9890200	17	48624523	C	A	-0.2532	0.0252	8.7e-24	0.375996	3301	Sun	100.955
Plasma	SPINK2	D6RI10;D6RC51;P20155;A0A087WTA9;A0A024RD95	rs11941335	4	57689460	T	C	0.9996	0.083	2.2e-33	0.021062	3301	Sun	145.043
Plasma	SPINK6	Q6UWN8	rs1432688	5	147603178	G	A	1.0579	0.0428	7.6e-135	0.924477	3301	Sun	610.944
Plasma	SPINT2	A0A140VJV6;O43291	rs71354995	19	38791841	G	A	-0.9908	0.0227	1e-200	0.242563	3301	Sun	1905.11
Plasma	SPINT3	P49223	rs6017591	20	44141041	C	T	0.5431	0.0227	6e-127	0.541306	3301	Sun	572.411
Plasma	SPOCK2	Q92563;A0A024QZQ5	rs1245540	10	73849752	T	C	0.2179	0.0243	3.3e-19	0.44884	3301	Sun	80.4085
Plasma	SPOCK3	Q9BQ16;A0A0A0MTJ2;B4DI52	rs17599599	4	167961738	A	G	0.8477	0.0765	1.5e-28	0.028272	3301	Sun	122.79
Plasma	SPON1	Q9HCB6	rs10832169	11	14066486	A	G	0.3748	0.0239	1.3e-55	0.490547	3301	Sun	245.925
Plasma	ST3GAL1	A0A024R9L6;Q11201	rs9643300	8	134503148	T	C	-0.2571	0.0246	1.4e-25	0.562654	3301	Sun	109.228
Plasma	ST3GAL6	A0A087WXB8;Q9Y274	rs72934623	3	98509705	A	G	-1.8784	0.0447	1e-200	0.053172	3301	Sun	1765.88
Plasma	SVEP1	B3KQM1;Q4LDE5;Q5JB40	rs61751937	9	113312231	C	G	1.1854	0.0702	5.2e-64	0.030029	3301	Sun	285.138
Plasma	SWAP70	B3KUB9;E7EMB1;Q9UH65	rs415895	11	9769562	G	C	-0.2659	0.0256	3.5e-25	0.649843	3301	Sun	107.884
Plasma	TAPBPL	Q9BX59	rs2532497	12	6564210	A	G	1.2577	0.0163	1e-200	0.273692	3301	Sun	5953.59
Plasma	TCN1	P20061	rs34528912	11	59631535	T	C	-0.7109	0.0624	4.6e-30	0.04157	3301	Sun	129.792
Plasma	TCN2	P20062	rs4820885	22	31012756	C	T	-0.7247	0.0212	1e-200	0.549103	3301	Sun	1168.54
Plasma	TEK	Q02763;Q59HG2	rs35030851	9	27197486	T	G	0.5573	0.057	1.4e-22	0.046653	3301	Sun	95.5935
Plasma	TEPSIN	Q96N21;A0A1B0GV70	rs61745945	17	79205421	A	G	-0.8768	0.0986	5.9e-19	0.016358	3301	Sun	79.0765
Plasma	TFF1	P04155	rs3761376	21	43787038	A	G	-0.2204	0.0291	3.9e-14	0.241766	3301	Sun	57.3637
Plasma	TGFBI	A0A0S2Z4Q2;Q15582	rs13159365	5	135389433	T	C	-0.4461	0.0239	5e-78	0.507136	3301	Sun	348.392
Plasma	THBS2	P35442	rs73043857	6	169624900	G	A	0.8084	0.0383	6.9e-99	0.102347	3301	Sun	445.508
Plasma	THSD1	A0A024R064;B3KTY7;Q9NS62	rs41292808	13	52971517	T	C	0.9059	0.0757	5.5e-33	0.026681	3301	Sun	143.208
Plasma	TIE1	B4DTW8;P35590	rs2275180	1	43773033	G	A	0.2538	0.0251	4.8e-24	0.623345	3301	Sun	102.244
Plasma	TIMP3	P35625	rs2097326	22	33165020	G	A	0.9307	0.0396733	4.424e-97	0.27873	992	Suhre	550.329
Plasma	TIMP4	Q99727	rs454615	3	12077010	C	T	0.4903	0.0318	1.7e-53	0.830831	3301	Sun	237.722
Plasma	TIRAP	A0A024R3M4;P58753	rs111577916	11	126071349	T	G	-0.5707	0.0774	1.6e-13	0.024689	3301	Sun	54.3668
Plasma	TLR4;LY96	O00206;Q9Y6Y9	rs4986790	9	120475302	G	A	-0.9019	0.0509	2.8e-70	0.05593	3301	Sun	313.965
Plasma	TMEM132A	Q24JP5	rs11230521	11	60698732	A	G	0.6176	0.0274	2e-112	0.231444	3301	Sun	508.058
Plasma	TMEM132C	Q8N3T6	rs11059617	12	128757909	T	A	-0.225	0.0257	2.2e-18	0.335066	3301	Sun	76.6476
Plasma	TMEM190	Q8WZ59	rs4806666	19	55888095	T	C	-0.997	0.0177	1e-200	0.438473	3301	Sun	3172.81
Plasma	TNFAIP6	P98066	rs289828	2	152137181	T	C	-0.5479	0.0237	5.5e-118	0.62173	3301	Sun	534.449
Plasma	TNFRSF11A	Q9Y6Q6	rs884205	18	60054857	C	A	-0.2235	0.0292	2e-14	0.756399	3301	Sun	58.5854
Plasma	TNFRSF6B	O95407	rs62217798	20	62347189	T	G	-0.224	0.0316	1.4e-12	0.784171	3301	Sun	50.2484
Plasma	TNFSF12;TNFSF12-TNFSF13	O43508;Q4ACW9;A0A0A6YY99	rs12941509	17	7448288	G	C	0.3933	0.0266	2.2e-49	0.279301	3301	Sun	218.617
Plasma	TPSAB1;TPSB2	P20231;Q15661;A0A140VJT7	rs4984778	16	1297516	C	G	0.5167	0.0463218	2.678e-27	0.284639	996	Suhre	124.425
Plasma	TPST1	A0A024RDK9;O60507	rs313829	7	65552497	G	A	0.2313	0.0262	1.1e-18	0.688554	3301	Sun	77.9379
Plasma	TPST2	A0A024R1G9;O60704	rs2283824	22	26924456	A	G	0.2429	0.0246	6e-23	0.416943	3301	Sun	97.4956
Plasma	TREML2	Q5T2D2	rs61998254	6	41166151	G	A	0.6927	0.0352	5e-86	0.126963	3301	Sun	387.262
Plasma	UCMA	A0A067XJP8;Q8WVF2;A0A067XKV3;A0A067XJX6	rs2093847	10	13276534	T	C	-0.5863	0.0382	3.1e-53	0.106703	3301	Sun	235.566
Plasma	UNC5C	A8K385;O95185	rs57091121	4	96444053	T	A	0.2694	0.0259	1.9e-25	0.336919	3301	Sun	108.192
Plasma	UROS	A0A0S2Z4T8;P10746;A0A0S2Z5C5;Q5T3L8	rs10794029	10	127561568	G	A	-0.2329	0.0311	7.6e-14	0.794492	3301	Sun	56.0813
Plasma	VEGFA	P15692;A0A024RD33;A0A024RD37;A0A0Y0IMM4;A2A2V4	rs6921438	6	43925607	A	G	-0.7023	0.0215	1e-200	0.496842	3301	Sun	1067.01
Plasma	VEGFC	P49767	rs41278571	4	177650866	T	C	1.7416	0.1215	1.3e-46	0.010126	3301	Sun	205.468
Plasma	VIT	Q6UXI7	rs10490666	2	36932493	T	A	0.3471	0.0264	1.9e-39	0.304408	3301	Sun	172.863
Plasma	VSIR	Q9H7M9	rs10762477	10	73531069	G	A	0.2705	0.0352	1.7e-14	0.14794	3301	Sun	59.054
Plasma	WFIKKN2	C9J6G4;Q8TEU8	rs7225465	17	48916159	A	G	-0.6533	0.0238	9.3e-166	0.68203	3301	Sun	753.479
Plasma	WISP1	O95388	rs35472615	8	134197537	A	G	0.5113	0.0263	1.7e-84	0.274129	3301	Sun	377.955
Plasma	XCL1	P47992	rs4656599	1	168503386	T	C	0.4295	0.0311	2e-43	0.189892	3301	Sun	190.724
Plasma	ACE	P12821	rs4344	17	61566724	A	G	-0.583	0.022	8.5e-136	0.499	3200	Emilsson	702.25
Plasma	ACHE	P22303	rs4727469	7	100509163	C	T	-0.297	0.023	7.5e-37	0.524	3200	Emilsson	166.747
Plasma	ACP6	Q9NPH0	rs2153463	1	147124310	G	T	0.944	0.022	1e-200	0.739	3200	Emilsson	1841.19
Plasma	ADAM12	O43184	rs10794057	10	127729734	T	C	-0.209	0.025	1.2e-16	0.398	3200	Emilsson	69.8896
Plasma	ADAM19	Q9H013	rs7728609	5	156935524	C	T	0.246	0.026	1.2e-21	0.675	3200	Emilsson	89.5207
Plasma	ADAM22	Q9P0K1	rs6966166	7	87455155	T	C	-0.177	0.026	9.8e-12	0.478	3200	Emilsson	46.3447
Plasma	ADH4	P08319	rs1800759	4	100065509	G	T	0.157	0.025	4.1e-10	0.622	3200	Emilsson	39.4384
Plasma	ADH5	P11766	rs1453873	4	100022571	C	T	-0.284	0.027	2.5e-25	0.742	3200	Emilsson	110.639
Plasma	ADH7	P40394	rs17529509	4	100351436	C	A	0.401	0.048	8e-17	0.927	3200	Emilsson	69.7921
Plasma	ADIPOQ	Q15848	rs143257534	3	186551888	C	T	0.425	0.072	3.3e-09	0.974	3200	Emilsson	34.8428
Plasma	AFP	P02771	rs6829551	4	74173715	T	C	0.187	0.031	2.4e-09	0.812	3200	Emilsson	36.3881
Plasma	AKR7A2	O43488	rs144376466	1	19600538	C	T	0.436	0.042	1.9e-24	0.912	3200	Emilsson	107.764
Plasma	ALPG	P10696	rs10933394	2	233249080	T	C	-0.192	0.026	1e-13	0.642	3200	Emilsson	54.5325
Plasma	ALPP	NA	rs12478529	2	233286654	C	T	-0.354	0.028	2.5e-35	0.778	3200	Emilsson	159.842
Plasma	AMY2B	P19961	rs17014913	1	104105635	A	G	0.433	0.034	3.2e-36	0.839	3200	Emilsson	162.188
Plasma	AOC1	P19801	rs10452848	7	150523544	A	G	-0.765	0.021	1e-200	0.498	3200	Emilsson	1327.04
Plasma	AP1G2	O75843	rs12897422	14	24033027	G	A	0.268	0.035	1.3e-14	0.858	3200	Emilsson	58.6318
Plasma	APOA1	P02647	rs75507001	11	116577694	C	A	0.55	0.061	1.7e-19	0.957	3200	Emilsson	81.2954
Plasma	APOBEC3G	Q9HC16	rs738469	22	39510995	A	G	0.245	0.042	4.5e-09	0.903	3200	Emilsson	34.0278
Plasma	APOF	Q13790	rs808919	12	56647911	C	G	0.321	0.04	6.9e-16	0.903	3200	Emilsson	64.4006
Plasma	APOH	P02749	rs1801690	17	64208285	C	G	0.552	0.053	6.5e-25	0.943	3200	Emilsson	108.474
Plasma	ARHGAP1	Q07960	rs5899	11	46747662	C	T	0.835	0.111	8.4e-14	0.989	3200	Emilsson	56.5883
Plasma	ASIP	P42127	rs62212171	20	32987687	T	C	-0.814	0.037	9.6e-98	0.89	3200	Emilsson	484
Plasma	AZU1	P20160	rs351976	19	806673	T	C	0.216	0.027	1.5e-15	0.709	3200	Emilsson	64
Plasma	B3GALT6	Q96L58	rs3766186	1	1162435	C	A	0.271	0.041	6.5e-11	0.899	3200	Emilsson	43.6889
Plasma	B3GLCT	Q6Y288	rs9544399	13	31885907	A	G	0.278	0.031	1.6e-19	0.791	3200	Emilsson	80.4204
Plasma	B3GNT8	Q7Z7M8	rs284663	19	41932612	T	C	0.744	0.021	1e-200	0.56	3200	Emilsson	1255.18
Plasma	B4GALT6	Q9UBX8	rs113222817	18	29216314	T	G	1.143	0.063	8.1e-71	0.965	3200	Emilsson	329.163
Plasma	BCAN	Q96GW7	rs7541549	1	156588439	T	C	0.201	0.029	5.6e-12	0.767	3200	Emilsson	48.0392
Plasma	BOC	Q9BWV1	rs73235147	3	112973955	A	T	-0.241	0.032	1.1e-13	0.833	3200	Emilsson	56.7197
Plasma	BPIFA2	Q96DR5	rs141715080	20	31742114	C	T	0.429	0.076	2e-08	0.973	3200	Emilsson	31.8631
Plasma	BTD	P43251	rs13100619	3	15549967	A	C	1.431	0.058	4.4e-122	0.962	3200	Emilsson	608.728
Plasma	BTNL8	Q6UX41	rs7721375	5	180439650	C	T	0.273	0.024	1.4e-28	0.507	3200	Emilsson	129.391
Plasma	C1QL1	O75973	rs9915692	17	43034207	A	G	-0.279	0.023	3.4e-32	0.463	3200	Emilsson	147.147
Plasma	C1QTNF3	Q9BXJ4	rs840390	5	34018623	G	A	0.203	0.037	2.8e-08	0.868	3200	Emilsson	30.1015
Plasma	C1RL	Q9NZP8	rs6488561	12	7246894	G	A	0.27	0.027	5.6e-24	0.695	3200	Emilsson	100
Plasma	C3	P01024	rs163494	19	6724340	C	T	0.264	0.031	3.4e-17	0.805	3200	Emilsson	72.5245
Plasma	C4BPA	P04003	rs11120218	1	207278451	G	A	-0.429	0.038	1.5e-28	0.889	3200	Emilsson	127.452
Plasma	C5	P01031	rs1035029	9	123742818	A	G	0.182	0.025	2.1e-13	0.611	3200	Emilsson	52.9984
Plasma	C9	P02748	rs265721	5	39354069	G	A	-0.375	0.06	5.9e-10	0.959	3200	Emilsson	39.0625
Plasma	CA1	P00915	rs2453868	8	86302696	T	C	-0.147	0.025	2.2e-09	0.582	3200	Emilsson	34.5744
Plasma	CA8	P35219	rs7009482	8	61195053	G	A	-0.188	0.025	5.9e-14	0.589	3200	Emilsson	56.5504
Plasma	CALCOCO2	Q13137	rs550510	17	46926615	G	A	0.19	0.033	1e-08	0.843	3200	Emilsson	33.1497
Plasma	CAPG	P40121	rs143448563	2	85610023	A	G	1.4	0.094	1e-48	0.983	3200	Emilsson	221.82
Plasma	CCL27	Q9Y4X3	rs2070074	9	34649442	A	G	0.321	0.041	1e-14	0.907	3200	Emilsson	61.2974
Plasma	CCL4L1	Q8NHW4	rs2687507	17	34433964	C	T	-0.239	0.029	1.5e-16	0.747	3200	Emilsson	67.9203
Plasma	CD274	Q9NZQ7	rs1411262	9	5459419	C	T	0.31	0.027	1.7e-29	0.736	3200	Emilsson	131.824
Plasma	CD300A	Q9UGN4	rs2272111	17	72469966	G	A	0.435	0.028	1.2e-52	0.788	3200	Emilsson	241.358
Plasma	CD300E	Q496F6	rs8081669	17	72614611	G	A	0.27	0.025	4.2e-27	0.551	3200	Emilsson	116.64
Plasma	CD7	P09564	rs116473040	17	80291652	A	G	0.962	0.057	1.3e-61	0.955	3200	Emilsson	284.84
Plasma	CD8A	P01732	rs111976570	2	87014112	A	C	-0.567	0.031	7.3e-73	0.81	3200	Emilsson	334.536
Plasma	CDCP1	Q9H5V8	rs7621542	3	45206484	C	T	0.18	0.031	5.9e-09	0.8	3200	Emilsson	33.7149
Plasma	CDH11	P55287	rs59614634	16	65029943	A	T	0.803	0.036	3.4e-101	0.89	3200	Emilsson	497.538
Plasma	CFHR1	Q03591	rs57809726	1	196841377	A	G	1.295	0.027	1e-200	0.862	3200	Emilsson	2300.45
Plasma	CFHR4	Q92496	rs4915559	1	196886770	T	C	0.655	0.026	1.7e-131	0.753	3200	Emilsson	634.652
Plasma	CHST12	Q9NRB3	rs2969076	7	2473747	A	G	-0.235	0.036	7.3e-11	0.872	3200	Emilsson	42.6119
Plasma	CLEC11A	Q9Y240	rs13866	19	51228746	C	T	0.154	0.026	4e-09	0.691	3200	Emilsson	35.0828
Plasma	CLEC1B	Q9P126	rs544605	12	10146707	T	C	-0.504	0.028	4.8e-70	0.781	3200	Emilsson	324
Plasma	CLEC4C	Q8WTT0	rs11055602	12	7904111	T	G	-0.95	0.019	1e-200	0.567	3200	Emilsson	2500
Plasma	CLN5	O75503	rs7996555	13	77562492	C	T	0.35	0.055	1.5e-10	0.946	3200	Emilsson	40.4959
Plasma	CNP	P09543	rs12602950	17	40123829	A	G	0.187	0.027	3.8e-12	0.704	3200	Emilsson	47.9684
Plasma	CPQ	Q9Y646	rs145746079	8	97832518	T	C	1.192	0.073	7.1e-58	0.972	3200	Emilsson	266.629
Plasma	CRHBP	P24387	rs6414971	5	76170674	T	A	-0.511	0.026	2.9e-79	0.741	3200	Emilsson	386.274
Plasma	CRLF1	O75462	rs2238647	19	18710535	G	A	-0.286	0.029	1.4e-22	0.778	3200	Emilsson	97.2604
Plasma	CROT	Q9UKG9	rs77463367	7	87006034	C	G	0.348	0.047	1.6e-13	0.93	3200	Emilsson	54.823
Plasma	CRTAC1	Q9NQ79	rs588061	10	99642731	C	T	0.346	0.024	8.6e-47	0.529	3200	Emilsson	207.84
Plasma	CRTAM	O95727	rs2370794	11	122714782	A	G	-0.236	0.026	5.8e-20	0.668	3200	Emilsson	82.3905
Plasma	CRYZ	Q08257	rs3819946	1	75175886	T	C	-1.175	0.029	1e-200	0.861	3200	Emilsson	1641.65
Plasma	CST4	P01036	rs7270028	20	23681073	C	A	0.465	0.039	1.8e-31	0.896	3200	Emilsson	142.16
Plasma	CTGF	P29279	rs9388953	6	132297509	G	A	0.353	0.03	8.7e-32	0.789	3200	Emilsson	138.454
Plasma	CTSC	P53634	rs55897509	11	88066714	A	C	-0.926	0.041	2.3e-107	0.918	3200	Emilsson	510.099
Plasma	CXCL10	P02778	rs4859589	4	76948299	G	A	0.133	0.0243978	5e-08	0.505	3200	Emilsson	29.7168
Plasma	CYB5D2	Q8WUJ1	rs77246175	17	4072761	G	C	-0.342	0.046	2e-13	0.921	3200	Emilsson	55.276
Plasma	CYTL1	Q9NRR1	rs62291616	4	5052063	T	C	-0.354	0.029	1.2e-32	0.814	3200	Emilsson	149.008
Plasma	DEFA1	P59665	rs4284061	8	6878257	A	T	0.171	0.024	3.3e-12	0.431	3200	Emilsson	50.7656
Plasma	DKK2	Q9UBU2	rs77571736	4	107864984	G	C	0.945	0.047	2.2e-83	0.954	3200	Emilsson	404.267
Plasma	DNER	Q8NFT8	rs35032874	2	230309360	T	G	0.162	0.029	1.7e-08	0.741	3200	Emilsson	31.2057
Plasma	DPEP1	P16444	rs423135	16	89740873	G	A	-0.313	0.024	5.5e-39	0.429	3200	Emilsson	170.085
Plasma	DUT	P33316	rs117540572	15	48670241	G	A	-0.339	0.05	2.1e-11	0.939	3200	Emilsson	45.9684
Plasma	DYNLL2	Q96FJ2	rs35729384	17	56178900	C	T	0.161	0.025	2.9e-10	0.698	3200	Emilsson	41.4736
Plasma	EBI3	Q14213	rs10409421	19	4254752	A	G	1.049	0.019	1e-200	0.716	3200	Emilsson	3048.2
Plasma	ECH1	Q13011	rs4802890	19	39304402	G	A	-0.533	0.044	2.2e-33	0.92	3200	Emilsson	146.74
Plasma	ENDOU	P21128	rs2072117	12	48131728	G	A	-0.163	0.026	3.8e-10	0.711	3200	Emilsson	39.3033
Plasma	EPHA2	P29317	rs28629977	1	16497272	C	G	-0.148	0.023	2e-10	0.564	3200	Emilsson	41.4064
Plasma	EPHB6	O15197	rs7789303	7	142552547	A	G	0.239	0.026	6.3e-20	0.725	3200	Emilsson	84.4985
Plasma	F13B	P05160	rs12116643	1	196973183	T	C	0.547	0.033	1.2e-60	0.863	3200	Emilsson	274.756
Plasma	FBLN1	P23142	rs67136035	22	45813433	T	D	0.132	0.0242144	5e-08	0.541	3200	Emilsson	29.7168
Plasma	FCN3	O75636	rs2474283	1	27716213	T	C	0.716	0.048	1.1e-48	0.933	3200	Emilsson	222.507
Plasma	FGFBP3	Q8TAT2	rs11186737	10	93666349	C	T	0.302	0.027	5.9e-28	0.746	3200	Emilsson	125.108
Plasma	FGFR3	P22607	rs2403274	4	1754515	C	G	0.177	0.029	6.7e-10	0.752	3200	Emilsson	37.2521
Plasma	FGL1	Q08830	rs7815429	8	17737357	T	C	-0.446	0.025	3.3e-70	0.313	3200	Emilsson	318.266
Plasma	FKBP7	Q9Y680	rs10930831	2	179303976	G	C	-0.365	0.027	2e-39	0.768	3200	Emilsson	182.75
Plasma	FMOD	Q06828	rs4971253	1	203321414	G	A	0.25	0.045	2.7e-08	0.921	3200	Emilsson	30.8642
Plasma	FTCD	O95954	rs149024257	21	47686213	G	A	-0.287	0.051	1.9e-08	0.938	3200	Emilsson	31.6682
Plasma	GAA	P10253	rs12450199	17	78076592	A	C	0.369	0.025	1.4e-48	0.647	3200	Emilsson	217.858
Plasma	GALNT16	Q8N428	rs12100668	14	69793475	G	A	-0.194	0.025	4.4e-15	0.408	3200	Emilsson	60.2176
Plasma	GDI2	P50395	rs2890364	10	5833748	G	A	0.219	0.029	9.1e-14	0.774	3200	Emilsson	57.0285
Plasma	GKN2	Q86XP6	rs13008230	2	69154583	T	G	0.942	0.076	2.7e-34	0.973	3200	Emilsson	153.63
Plasma	GLO1	Q04760	rs12209477	6	38669799	C	G	0.168	0.026	7.1e-11	0.66	3200	Emilsson	41.7515
Plasma	GNMT	Q14749	rs9471987	6	42944140	A	G	0.4	0.024	2.4e-61	0.402	3200	Emilsson	277.778
Plasma	GNPTG	Q9UJJ9	rs4984820	16	1407809	C	T	-0.344	0.046	8e-14	0.923	3200	Emilsson	55.9244
Plasma	GSN	P06396	rs76331566	9	124009014	C	T	0.398	0.068	5e-09	0.969	3200	Emilsson	34.2569
Plasma	GSTM3	P21266	rs115929572	1	110246053	G	A	-0.249	0.031618	3.4e-15	0.935	3200	Emilsson	62.0199
Plasma	HDGF	P51858	rs4399146	1	156713558	G	A	0.269	0.027	3.2e-23	0.717	3200	Emilsson	99.2606
Plasma	HIBCH	Q6NVY1	rs291447	2	191177005	A	C	-0.631	0.023	2.9e-152	0.393	3200	Emilsson	752.667
Plasma	HPSE	Q9Y251	rs11732810	4	84230878	G	T	0.541	0.028	7.7e-78	0.773	3200	Emilsson	373.318
Plasma	HSD17B14	Q9BPX1	rs473464	19	49334248	T	C	0.145	0.026	2.7e-08	0.498	3200	Emilsson	31.1021
Plasma	IFNLR1	Q8IU57	rs12046369	1	24526135	G	T	0.244	0.035	3.3e-12	0.853	3200	Emilsson	48.6008
Plasma	IGDCC4	Q8TDY8	rs8034057	15	65789430	G	A	0.344	0.042	3.5e-16	0.905	3200	Emilsson	67.0839
Plasma	IGFBP5	P24593	rs139739387	2	217402489	A	G	0.608	0.098	7e-10	0.984	3200	Emilsson	38.4906
Plasma	IL10RB	Q08334	rs2834167	21	34640788	A	G	0.16	0.028	1.1e-08	0.732	3200	Emilsson	32.6531
Plasma	IL1R1	P14778	rs7588201	2	102746276	A	C	0.163	0.026	2.6e-10	0.722	3200	Emilsson	39.3033
Plasma	IL7	P13232	rs72666886	8	79728782	C	T	0.34	0.042	5.3e-16	0.903	3200	Emilsson	65.5329
Plasma	IMPAD1	Q9NX62	rs112433249	8	57876576	T	C	1.685	0.136	1.7e-34	0.992	3200	Emilsson	153.505
Plasma	INPP5B	P32019	rs61778082	1	38306356	T	C	0.547	0.034	2.1e-55	0.865	3200	Emilsson	258.831
Plasma	ITIH2	P19823	rs73621225	10	7740905	T	A	-1.181	0.044	1.4e-142	0.933	3200	Emilsson	720.434
Plasma	JAM3	Q9BX67	rs655627	11	134021859	A	G	0.184	0.024	4.1e-14	0.566	3200	Emilsson	58.7778
Plasma	KIAA1549L	Q6ZVL6	rs12792396	11	33417110	G	A	0.439	0.025	7.1e-68	0.381	3200	Emilsson	308.354
Plasma	KIAA2013	Q8IYS2	rs11588551	1	11941936	T	C	0.178	0.025	2e-12	0.418	3200	Emilsson	50.6944
Plasma	KLK10	O43240	rs2569454	19	51523203	C	T	0.405	0.026	4.5e-54	0.641	3200	Emilsson	242.641
Plasma	KLK13	Q9UKR3	rs3760739	19	51538561	G	T	0.388	0.025	3.9e-54	0.659	3200	Emilsson	240.87
Plasma	KLRB1	Q12918	rs3933456	12	9753788	C	A	0.213	0.026	2.1e-16	0.625	3200	Emilsson	67.1139
Plasma	LAG3	P18627	rs3782735	12	6885076	A	G	0.154	0.025	4.3e-10	0.607	3200	Emilsson	37.9456
Plasma	LANCL1	O43813	rs187097936	2	211362949	C	G	0.781	0.103	3.7e-14	0.985	3200	Emilsson	57.4947
Plasma	LBP	P18428	rs73112473	20	37006729	C	T	1.009	0.043	2.4e-112	0.922	3200	Emilsson	550.612
Plasma	LEAP2	Q969E1	rs57880964	5	132210674	G	C	-0.3	0.033	4.1e-19	0.838	3200	Emilsson	82.6446
Plasma	LECT2	O14960	rs248160	5	135293512	T	C	-0.312	0.026	3.7e-33	0.67	3200	Emilsson	144
Plasma	LGALS3BP	Q08380	rs4789847	17	77004644	A	G	-0.196	0.033	3.9e-09	0.829	3200	Emilsson	35.2764
Plasma	LGALS4	P56470	rs55945853	19	39230046	G	A	0.181	0.024	7.7e-14	0.51	3200	Emilsson	56.8767
Plasma	LGALS9	O00182	rs62055780	17	25971795	T	C	0.203	0.03	7.9e-12	0.753	3200	Emilsson	45.7878
Plasma	LGMN	Q99538	rs7140705	14	93224207	T	G	-0.268	0.045	3.6e-09	0.913	3200	Emilsson	35.4686
Plasma	LILRA3	Q8N6C8	rs398217	19	54793038	A	G	1.243	0.02	1e-200	0.773	3200	Emilsson	3862.62
Plasma	LRP11	Q86VZ4	rs9371533	6	150210681	A	G	0.825	0.021	1e-200	0.376	3200	Emilsson	1543.37
Plasma	LRP12	Q9Y561	rs72679151	8	105627117	C	T	-0.211	0.03	2.6e-12	0.796	3200	Emilsson	49.4678
Plasma	LRP8	Q14114	rs10218811	1	53805882	A	G	0.166	0.027	9.8e-10	0.725	3200	Emilsson	37.7997
Plasma	LRRC4C	Q9HCJ2	rs998447	11	40310789	A	C	-0.137	0.024	2.2e-08	0.538	3200	Emilsson	32.5851
Plasma	LSAMP	Q13449	rs17646258	3	116038249	C	T	0.222	0.031	1.5e-12	0.829	3200	Emilsson	51.2841
Plasma	LYVE1	Q9Y5Y7	rs114527818	11	10619041	T	A	-0.369	0.055	3.3e-11	0.951	3200	Emilsson	45.0119
Plasma	MAN1A2	O60476	rs1289863	1	117854689	C	T	0.21	0.026	1.5e-15	0.692	3200	Emilsson	65.2367
Plasma	MAN1C1	Q9NR34	rs3767879	1	26070909	C	T	0.172	0.023	9.3e-14	0.465	3200	Emilsson	55.9244
Plasma	MANF	P55145	rs1552074	3	51408051	T	C	0.391	0.035	2.6e-28	0.859	3200	Emilsson	124.801
Plasma	MENT	Q9BUN1	rs12759273	1	151045024	C	A	0.669	0.116	8.6e-09	0.988	3200	Emilsson	33.2611
Plasma	METTL24	Q5JXM2	rs12189608	6	110573292	A	T	0.378	0.061	7.4e-10	0.956	3200	Emilsson	38.3994
Plasma	NCAM2	O15394	rs2826851	21	22835946	A	G	-0.37	0.027	1.7e-42	0.733	3200	Emilsson	187.791
Plasma	NCR1	O76036	rs143981324	19	55419632	T	C	0.362	0.042	1.3e-17	0.904	3200	Emilsson	74.288
Plasma	NEGR1	Q7Z3B1	rs2220253	1	72565460	T	C	0.148	0.024	1.2e-09	0.545	3200	Emilsson	38.0278
Plasma	NLGN2	Q8NFZ4	rs150452493	17	7303808	C	T	0.252	0.04	4.9e-10	0.9	3200	Emilsson	39.69
Plasma	NMB	P08949	rs12912342	15	85248216	T	C	0.164	0.025	7.6e-11	0.661	3200	Emilsson	43.0336
Plasma	NPNT	Q6UXI9	rs78213340	4	106819613	T	C	0.314	0.049	1.7e-10	0.93	3200	Emilsson	41.0646
Plasma	NPTXR	O95502	rs12628473	22	39240717	A	G	-1.013	0.107	4.6e-21	0.987	3200	Emilsson	89.6296
Plasma	NQO2	P16083	rs138616686	6	3003970	A	G	0.435	0.025	3.8e-64	0.626	3200	Emilsson	302.76
Plasma	NTM	Q9P121	rs2511504	11	131196396	T	C	-0.381	0.023	1.7e-58	0.588	3200	Emilsson	274.406
Plasma	NTRK3	Q16288	rs9944243	15	88514162	T	G	-0.221	0.035	5.2e-10	0.879	3200	Emilsson	39.8702
Plasma	OLFM1	Q99784	rs11103667	9	137978360	C	T	-0.193	0.032	2.6e-09	0.815	3200	Emilsson	36.376
Plasma	OLFM2	O95897	rs56243392	19	10061960	A	T	-0.673	0.024	6e-157	0.651	3200	Emilsson	786.335
Plasma	OSCAR	Q8IYS5	rs4442925	19	54554950	T	C	0.138	0.024	1.3e-08	0.455	3200	Emilsson	33.0625
Plasma	OXT	P01178	rs877172	20	3049890	T	G	-0.669	0.024	5.6e-156	0.66	3200	Emilsson	777.016
Plasma	PCBD1	P61457	rs72818110	10	72614896	A	C	0.374	0.057	7.6e-11	0.951	3200	Emilsson	43.052
Plasma	PCDH9	Q9HC56	rs1927820	13	67774646	G	C	-0.266	0.033	2.2e-15	0.846	3200	Emilsson	64.9734
Plasma	PCSK9	Q8NBP7	rs191448950	1	55584844	G	A	1.069	0.113	8.4e-21	0.989	3200	Emilsson	89.4949
Plasma	PCYOX1	Q9UHG3	rs2706762	2	70488470	C	T	0.79	0.032	1.4e-121	0.86	3200	Emilsson	609.473
Plasma	PDIA3	P30101	rs3110081	15	43995786	C	T	0.194	0.032	1.5e-09	0.821	3200	Emilsson	36.7539
Plasma	PDLIM4	P50479	rs6864922	5	131616290	C	T	0.676	0.048	1.5e-44	0.937	3200	Emilsson	198.34
Plasma	PEBP1	P30086	rs76597567	12	118584885	A	G	1.971	0.085	4e-111	0.982	3200	Emilsson	537.694
Plasma	PGLYRP2	Q96PD5	rs55866012	19	15578008	T	G	0.486	0.033	1.8e-47	0.842	3200	Emilsson	216.893
Plasma	PIP	P12273	rs4726600	7	142881540	G	A	-0.188	0.027	7.8e-12	0.741	3200	Emilsson	48.4829
Plasma	PKDCC	Q504Y2	rs893812	2	42303114	C	T	-0.236	0.027	5.6e-18	0.731	3200	Emilsson	76.4005
Plasma	PLAT	P00750	rs77346091	8	42020158	T	C	0.549	0.077	1.2e-12	0.973	3200	Emilsson	50.835
Plasma	PLAUR	Q03405	rs2302524	19	44156472	T	C	0.22	0.031	7.9e-13	0.82	3200	Emilsson	50.3642
Plasma	PLXNA1	Q9UIW2	rs891762	3	126739012	G	T	-0.182	0.027	9.6e-12	0.318	3200	Emilsson	45.4376
Plasma	PNLIPRP2	P54317	rs7910135	10	118398046	C	A	-0.969	0.018	1e-200	0.493	3200	Emilsson	2898.03
Plasma	POSTN	Q15063	rs962462	13	38089171	A	G	0.244	0.025	8.6e-23	0.714	3200	Emilsson	95.2576
Plasma	PRDX6	P30041	rs6671141	1	173446934	T	G	-0.413	0.034	8.8e-33	0.85	3200	Emilsson	147.551
Plasma	PREP	P48147	rs1051484	6	105726036	C	T	-0.453	0.032	7e-44	0.835	3200	Emilsson	200.399
Plasma	PROK2	Q9HC23	rs7644362	3	71829242	A	G	-1.001	0.025	1e-200	0.798	3200	Emilsson	1603.2
Plasma	PRSS57	Q6UWY2	rs9304936	19	689590	G	C	0.599	0.026	7.5e-107	0.715	3200	Emilsson	530.771
Plasma	PSAP	P07602	rs7086891	10	73655350	G	A	0.619	0.025	3.6e-122	0.709	3200	Emilsson	613.058
Plasma	PSMB1	P20618	rs756519	6	170850862	G	A	0.412	0.023	8.1e-67	0.531	3200	Emilsson	320.877
Plasma	PTGR1	Q14914	rs112140014	9	114325849	G	C	-0.726	0.055	2.1e-38	0.952	3200	Emilsson	174.24
Plasma	PTPRU	Q92729	rs2179795	1	29642318	G	T	0.154	0.028	3.8e-08	0.725	3200	Emilsson	30.25
Plasma	PXDN	Q92626	rs34008669	2	1709779	G	A	0.158	0.023	1.8e-11	0.502	3200	Emilsson	47.1909
Plasma	PYY	P10082	rs8074783	17	42028989	C	A	0.157	0.026	1.2e-09	0.641	3200	Emilsson	36.463
Plasma	PZP	P20742	rs7311982	12	9314857	C	T	0.5	0.019	2.7e-135	0.698	3200	Emilsson	692.521
Plasma	QPCT	Q16769	rs13027919	2	37567636	C	T	0.271	0.024	3.5e-28	0.538	3200	Emilsson	127.502
Plasma	RAB6B	Q9NRW1	rs9813363	3	133604743	G	A	0.278	0.032	1.2e-17	0.825	3200	Emilsson	75.4727
Plasma	RBP4	P02753	rs36014035	10	95360027	A	C	0.147	0.025	7.2e-09	0.643	3200	Emilsson	34.5744
Plasma	RECQL	P46063	rs144436375	12	21515500	A	C	-0.935	0.086	9e-27	0.98	3200	Emilsson	118.202
Plasma	REG3G	Q6UW15	rs429694	2	79244586	A	C	-0.487	0.028	9.5e-63	0.794	3200	Emilsson	302.511
Plasma	RNASE3	P12724	rs2771316	14	21430474	C	T	0.214	0.028	1.2e-14	0.723	3200	Emilsson	58.4133
Plasma	RNPEP	Q9H4A4	rs59698324	1	201965855	C	T	0.371	0.027	3.8e-42	0.725	3200	Emilsson	188.808
Plasma	RSPO4	Q2I0M5	rs6056847	20	1028346	G	A	-0.172	0.023	9e-14	0.575	3200	Emilsson	55.9244
Plasma	S100A7	P31151	rs3014860	1	153314782	A	G	-1.208	0.051	1.8e-114	0.948	3200	Emilsson	561.04
Plasma	SCUBE1	Q8IWY4	rs2744874	22	43715862	T	C	-0.27	0.036	3.8e-14	0.866	3200	Emilsson	56.25
Plasma	SELPLG	Q14242	rs73191242	12	109013956	G	A	0.209	0.03	2.1e-12	0.795	3200	Emilsson	48.5344
Plasma	SEMA4C	Q9C0C4	rs112826173	2	97489654	A	G	0.713	0.09	4e-15	0.981	3200	Emilsson	62.7616
Plasma	SEMA4D	Q92854	rs45464494	9	91994433	C	T	1.278	0.041	1.5e-187	0.929	3200	Emilsson	971.615
Plasma	SERPINA11	Q86U17	rs17090881	14	94913209	C	A	0.288	0.031	1.8e-20	0.835	3200	Emilsson	86.3101
Plasma	SFRP4	Q6FHJ7	rs75474297	7	37973124	T	A	-0.302	0.034	2.1e-18	0.855	3200	Emilsson	78.8962
Plasma	SFTPB	P07988	rs1130866	2	85893741	A	G	-0.686	0.022	3.5e-189	0.466	3200	Emilsson	972.306
Plasma	SHANK3	Q9BYB0	rs6010042	22	51098764	G	A	-0.327	0.027	6.6e-33	0.748	3200	Emilsson	146.679
Plasma	SHBG	P04278	rs858519	17	7531965	T	C	-0.214	0.024	2.3e-18	0.474	3200	Emilsson	79.5069
Plasma	SHMT1	P34896	rs8067462	17	18263571	C	A	-0.3	0.025	1e-31	0.607	3200	Emilsson	144
Plasma	SLITRK3	O94933	rs62282371	3	164911694	T	G	0.345	0.038	3.7e-19	0.887	3200	Emilsson	82.4273
Plasma	SMPD1	P17405	rs1050239	11	6415463	G	A	0.31	0.026	1.8e-31	0.715	3200	Emilsson	142.16
Plasma	SOD3	P08294	rs2695234	4	24804238	G	A	-0.736	0.042	1.1e-64	0.919	3200	Emilsson	307.084
Plasma	SPINK1	P00995	rs4705205	5	147218813	T	C	-0.212	0.025	1.5e-17	0.573	3200	Emilsson	71.9104
Plasma	SPINK5	Q9NQ38	rs2052536	5	147504557	T	G	-0.152	0.026	3.3e-09	0.349	3200	Emilsson	34.1775
Plasma	SPON2	Q9BUD6	rs878323	4	1169813	T	G	-0.213	0.026	1.8e-16	0.687	3200	Emilsson	67.1139
Plasma	SRL	Q86TD4	rs8046884	16	4269558	C	G	0.15	0.024	6.3e-10	0.495	3200	Emilsson	39.0625
Plasma	ST6GALNAC6	Q969X2	rs183995738	9	130542640	C	A	-0.715	0.107	3.1e-11	0.987	3200	Emilsson	44.6524
Plasma	SULT2A1	Q06520	rs296369	19	48371853	C	T	0.36	0.033	1.7e-27	0.843	3200	Emilsson	119.008
Plasma	TF	P02787	rs4854760	3	133498741	A	G	-0.227	0.028	6.1e-16	0.735	3200	Emilsson	65.7258
Plasma	TGFB1	P01137	rs1800470	19	41858921	A	G	0.259	0.024	4.5e-26	0.621	3200	Emilsson	116.46
Plasma	THBS4	P35443	rs35351529	5	79390222	T	C	-0.298	0.044	2.3e-11	0.923	3200	Emilsson	45.8698
Plasma	TIMP2	P16035	rs2376999	17	76890864	A	G	0.418	0.037	3.3e-29	0.884	3200	Emilsson	127.629
Plasma	TMEM106B	Q9NUM4	rs10950398	7	12264871	A	G	-0.272	0.025	6.1e-27	0.393	3200	Emilsson	118.374
Plasma	TMEM132D	Q14C87	rs61943549	12	130092229	T	C	-0.486	0.055	1e-18	0.948	3200	Emilsson	78.0813
Plasma	TNFRSF10B	O14763	rs4871844	8	22879734	T	C	-0.143	0.026	4.3e-08	0.658	3200	Emilsson	30.25
Plasma	TNFRSF19	Q9NS68	rs3814787	13	24152370	G	C	-0.166	0.026	2.1e-10	0.714	3200	Emilsson	40.7633
Plasma	TREM1	Q9NP99	rs3789204	6	41254741	G	T	-0.374	0.024	1.4e-54	0.693	3200	Emilsson	242.84
Plasma	TREM2	Q9NZC2	rs114812713	6	41034000	G	C	0.36	0.057	3.1e-10	0.955	3200	Emilsson	39.8892
Plasma	TREML1	Q86YW5	rs62396317	6	41095817	A	G	0.211	0.038	2.9e-08	0.878	3200	Emilsson	30.8317
Plasma	TXNDC15	Q96J42	rs78165052	5	134250596	C	T	-0.307	0.036	3.6e-17	0.875	3200	Emilsson	72.723
Plasma	TYMP	P19971	rs131798	22	50971509	G	T	0.204	0.03	1.8e-11	0.773	3200	Emilsson	46.24
Plasma	TYRO3	Q06418	rs2289743	15	41860698	C	G	-0.161	0.027	2.1e-09	0.691	3200	Emilsson	35.5569
Plasma	UBASH3B	Q8TF42	rs10502249	11	122504251	G	T	0.187	0.027	1.1e-11	0.712	3200	Emilsson	47.9684
Plasma	UGT1A6	P19224	rs111741722	2	234665983	A	G	0.265	0.027	1.8e-22	0.681	3200	Emilsson	96.3306
Plasma	ULBP3	Q9BZM4	rs17054300	6	150370552	G	A	0.171	0.028	1.7e-09	0.762	3200	Emilsson	37.2972
Plasma	UNC5D	Q6UXZ4	rs6468316	8	35237788	T	C	0.141	0.024	9.5e-09	0.417	3200	Emilsson	34.5156
Plasma	UST	Q9Y2C2	rs11155591	6	149064986	C	T	0.149	0.026	1.2e-08	0.685	3200	Emilsson	32.8417
Plasma	UXS1	Q8NBZ7	rs12617748	2	106836042	G	A	-0.219	0.036	1.7e-09	0.87	3200	Emilsson	37.0069
Plasma	VAV1	P15498	rs56100731	19	6857245	C	T	0.363	0.048	5.6e-14	0.93	3200	Emilsson	57.1914
Plasma	VWA2	Q5GFL6	rs11595697	10	115905775	C	T	-0.431	0.042	7.8e-25	0.903	3200	Emilsson	105.307
Plasma	VWC2	Q2TAL6	rs79259707	7	49812564	C	A	0.34	0.035	1.3e-22	0.868	3200	Emilsson	94.3673
Plasma	WARS	P23381	rs941923	14	100813077	C	T	0.255	0.029	6.6e-18	0.766	3200	Emilsson	77.3187
Plasma	WFDC1	Q9HC57	rs400345	16	84328494	C	T	0.451	0.029	5.5e-54	0.791	3200	Emilsson	241.856
Plasma	WFDC5	Q8TCV5	rs35017113	20	43692684	C	T	0.229	0.033	4.7e-12	0.843	3200	Emilsson	48.1552
Plasma	WFIKKN1	Q96NZ8	rs11248941	16	658271	G	T	-0.203	0.028	2.3e-13	0.732	3200	Emilsson	52.5625
Plasma	WISP2	O76076	rs1061098	20	43356156	C	T	0.213	0.022	4.8e-21	0.663	3200	Emilsson	93.7376
Plasma	XXYLT1	Q8NBI6	rs55947051	3	194783033	T	C	-0.248	0.033	8.6e-14	0.841	3200	Emilsson	56.4775
Plasma	ZG16B	Q96DA0	rs2190809	16	2880614	C	T	0.156	0.027	1.5e-08	0.725	3200	Emilsson	33.3827
CSF	6-Phosphogluconate dehydrogenase	P52209	rs141107515	1	10461933	G	A	-0.184683	0.0203151	9.82213e-20	0.977015	835	Yang	82.6445
CSF	AK1A1	P14550	rs2229540	1	46032311	G	A	-0.191302	0.0120299	6.12071e-57	0.046123	835	Yang	252.879
CSF	Apo E2	P02649	rs71352238	19	45394336	G	A	0.0225666	0.00389151	6.67415e-09	0.191255	835	Yang	33.6275
CSF	Apo L1	O14791	rs10854688	22	36653854	T	C	-0.0590411	0.010525	2.02783e-08	0.698962	835	Yang	31.4677
CSF	ARMEL	Q49AH0	rs72772417	10	14873794	T	C	0.0876585	0.0103246	2.06173e-17	0.0440781	835	Yang	72.0845
CSF	ART	O00253	rs9928014	16	67991427	T	C	0.0836056	0.0135159	6.18128e-10	0.938837	835	Yang	38.2633
CSF	ARTS1	Q9NZ08	rs17482078	5	96118866	T	C	-0.245997	0.0119093	8.64477e-95	0.188919	835	Yang	426.665
CSF	Arylsulfatase A	P15289	rs6151419	22	51064915	G	A	-0.0670549	0.00729667	3.93584e-20	0.840273	835	Yang	84.4524
CSF	ASAH2	Q9NR71	rs2813302	10	52012044	G	A	-0.0600622	0.00594616	5.46766e-24	0.267403	835	Yang	102.03
CSF	ASAHL	Q02083	rs66498356	4	76857064	G	C	-0.134239	0.00746025	2.1747e-72	0.718645	835	Yang	323.781
CSF	ATS13	Q76LX8	rs34265876	9	136287207	G	A	-0.0810075	0.012265	3.98158e-11	0.0800971	835	Yang	43.6229
CSF	B7-H1	Q9NZQ7	rs7048841	9	5460801	T	C	0.047533	0.00446391	1.77584e-26	0.472129	835	Yang	113.386
CSF	B7-H2	O75144	rs56124762	21	45658474	G	A	-0.103022	0.0063329	1.67221e-59	0.238213	835	Yang	264.639
CSF	BSP	P21815	rs6855426	4	88646335	G	A	0.135501	0.0237828	1.21624e-08	0.719692	835	Yang	32.4608
CSF	BST1	Q10588	rs7683000	4	15647074	G	A	-0.179222	0.00939051	3.33719e-81	0.162342	835	Yang	364.254
CSF	C1-Esterase Inhibitor	P05155	rs11603020	11	57374332	G	A	-0.054944	0.00576479	1.55823e-21	0.258839	835	Yang	90.8394
CSF	CAPG	P40121	rs3770102	2	85637837	A	C	0.0333235	0.00514727	9.54331e-11	0.39397	835	Yang	41.9129
CSF	Carbonic Anhydrase IV	P22748	rs62083731	17	58262406	T	C	-0.10296	0.0141736	3.75156e-13	0.960878	835	Yang	52.7691
CSF	CATF	Q9UBX1	rs572846	11	66331458	G	A	-0.0246714	0.004517	4.71065e-08	0.564462	835	Yang	29.8324
CSF	Cathepsin B	P07858	rs1736065	8	11685453	G	A	0.0545875	0.00514464	2.66173e-26	0.251177	835	Yang	112.584
CSF	Cathepsin H	P09668	rs2869887	15	79155033	A	C	-0.0744228	0.00846944	1.53308e-18	0.235913	835	Yang	77.2152
CSF	Cathepsin S	P25774	rs41271951	1	150737220	G	A	-0.124607	0.008779	1.00134e-45	0.0708024	835	Yang	201.463
CSF	CBPE	P16870	rs11736871	4	166336382	T	C	0.0284618	0.00453148	3.36615e-10	0.689751	835	Yang	39.4497
CSF	CD30 Ligand	P32971	rs3181370	9	117665752	G	A	-0.0296433	0.004269	3.81563e-12	0.3998	835	Yang	48.217
CSF	CD5L	O43866	rs6427401	1	157748564	G	A	0.0593939	0.0105475	1.79071e-08	0.496309	835	Yang	31.7092
CSF	CDON	Q4KMG0	rs76617496	11	125870397	G	A	0.136466	0.0124256	4.63026e-28	0.0367647	835	Yang	120.619
CSF	Chitotriosidase-1	Q13231	rs2244385	1	203191262	G	C	-0.28168	0.0230788	2.91887e-34	0.176985	835	Yang	148.965
CSF	CLC7A	Q9BXN2	rs16909966	12	10224430	C	A	-0.118182	0.00903747	4.46303e-39	0.0739191	835	Yang	171.005
CSF	CNTN2	Q02246	rs2242001	1	205031744	G	A	-0.0877676	0.00605492	1.29802e-47	0.842194	835	Yang	210.113
CSF	Coagulation Factor V	P12259	rs966751	1	169486141	G	C	-0.106112	0.0120489	1.28811e-18	0.0500668	835	Yang	77.5591
CSF	Coagulation Factor VII	P08709	rs488703	13	113770876	G	A	-0.165473	0.0108134	7.34078e-53	0.877248	835	Yang	234.171
CSF	Collectin Kidney 1	Q9BWP8	rs10206003	2	3672670	G	A	0.204862	0.0140327	2.85473e-48	0.121677	835	Yang	213.127
CSF	complement factor H-related 5	Q9BXR6	rs35662416	1	196967354	G	A	-0.163473	0.0228649	8.709e-13	0.978037	835	Yang	51.1155
CSF	CREL1	Q96HD1	rs58020561	3	10054682	G	A	-0.0583374	0.00682588	1.26873e-17	0.28318	835	Yang	73.0427
CSF	Cripto	P13385	rs11713041	3	46770034	T	C	0.175753	0.0216506	4.75168e-16	0.941238	835	Yang	65.8968
CSF	Cyclophilin F	P30405	rs11002931	10	81094251	C	A	-0.0338668	0.00395178	1.03476e-17	0.265292	835	Yang	73.4451
CSF	Cystatin M	Q15828	rs610497	11	65765551	G	A	0.131858	0.0071373	3.31356e-76	0.229694	835	Yang	341.307
CSF	DC-SIGN	Q9NNX6	rs1010047	19	7793502	G	A	-0.0341856	0.00537876	2.0753e-10	0.541583	835	Yang	40.3944
CSF	DERM	Q07507	rs545833	1	168689940	T	C	0.0653177	0.006357	9.1418e-25	0.270126	835	Yang	105.574
CSF	DLL1	O00548	rs9348260	6	170516123	G	A	0.0282914	0.00509402	2.7945e-08	0.315037	835	Yang	30.8452
CSF	DPP2	Q9UHL4	rs6420280	9	140002501	T	C	-0.0574942	0.00393408	2.27412e-48	0.219286	835	Yang	213.58
CSF	ECM1	Q16610	rs7002	1	150445819	G	A	-0.0231793	0.00350005	3.53042e-11	0.368704	835	Yang	43.8582
CSF	EGF	P01133	rs10488881	4	110877416	T	A	0.0353458	0.0062474	1.5343e-08	0.32953	835	Yang	32.0094
CSF	EMR2	Q9UHX3	rs11880837	19	14808453	G	A	0.0536702	0.00514078	1.6266e-25	0.704746	835	Yang	108.995
CSF	Endocan	Q9NQ30	rs4865911	5	54324920	G	A	0.0351592	0.00570558	7.17211e-10	0.38676	835	Yang	37.9733
CSF	EphA1	P21709	rs7792781	7	143107026	T	C	-0.126315	0.00924796	1.79201e-42	0.0720993	835	Yang	186.56
CSF	ERBB1	P00533	rs6957408	7	54923277	T	C	-0.0400536	0.00669345	2.17726e-09	0.160252	835	Yang	35.8082
CSF	Esterase D	P10768	rs8192887	13	47362478	T	C	-0.203704	0.0121741	7.58325e-63	0.0965909	835	Yang	279.98
CSF	FAM3B	P58499	rs2838014	21	42697714	G	C	0.246444	0.00915178	1.01786e-159	0.192361	835	Yang	725.146
CSF	FAM3D	Q96BQ1	rs4020782	3	58648031	T	C	-0.0760098	0.010899	3.08024e-12	0.120173	835	Yang	48.6369
CSF	Fas, soluble	P25445	rs4406737	10	90759724	G	A	0.0599798	0.00478026	4.1082e-36	0.537259	835	Yang	157.437
CSF	FCG2B	P31994	rs4657041	1	161478859	T	C	0.32685	0.0118739	8.38531e-167	0.496423	835	Yang	757.726
CSF	FGF-19	O95750	rs4980680	11	69523592	G	A	-0.0848136	0.00877819	4.37845e-22	0.849931	835	Yang	93.3515
CSF	FGF-19	O95750	rs7480286	11	69664318	T	A	0.0374192	0.0067633	3.15365e-08	0.643635	835	Yang	30.6106
CSF	FSTL3	O95633	rs2301742	19	675513	C	A	-0.0262986	0.00393592	2.36203e-11	0.446416	835	Yang	44.645
CSF	FUT5	Q11128	rs78114888	19	5947688	G	A	0.127027	0.00815949	1.20101e-54	0.844535	835	Yang	242.363
CSF	Galectin-3	P17931	rs76426991	14	55600939	G	A	-0.0878037	0.00652314	2.67696e-41	0.918955	835	Yang	181.181
CSF	Galectin-8	O00214	rs16833818	1	236701459	G	C	-0.0329971	0.0036782	2.93884e-19	0.672263	835	Yang	80.4785
CSF	Gelsolin	P06396	rs76098787	9	124047836	T	C	0.0570599	0.00818039	3.05423e-12	0.960784	835	Yang	48.6535
CSF	Glutathione S-transferase Pi	P09211	rs4891	11	67353970	G	A	-0.100814	0.00578214	4.44227e-68	0.352075	835	Yang	303.994
CSF	GPC5	P78333	rs9523318	13	92035073	G	A	0.0363543	0.00547322	3.09009e-11	0.599515	835	Yang	44.119
CSF	GPC5	P78333	rs4331227	13	92485166	T	C	0.0310598	0.00551962	1.83195e-08	0.642857	835	Yang	31.665
CSF	GPNMB	Q14956	rs858274	7	23294668	T	C	-0.114033	0.0059569	1.10666e-81	0.544177	835	Yang	366.455
CSF	GPVI	Q9HCN6	rs1613662	19	55536595	G	A	-0.096034	0.00909451	4.58798e-26	0.172987	835	Yang	111.504
CSF	Granulysin	P22749	rs12151621	2	85934499	C	A	0.211822	0.0144701	1.59359e-48	0.760187	835	Yang	214.288
CSF	Growth hormone receptor	P10912	rs58934290	5	42640886	G	A	0.0448098	0.00705176	2.09223e-10	0.269282	835	Yang	40.3786
CSF	Haptoglobin, Mixed Type	P00738	rs77303550	16	72079657	T	C	0.711755	0.0667807	1.59833e-26	0.193266	835	Yang	113.595
CSF	HCC-4	O15467	rs74842203	17	34304680	T	C	-0.216248	0.0328726	4.75642e-11	0.0216718	835	Yang	43.2749
CSF	Heparin cofactor II	P05546	rs165818	22	21122412	T	C	0.0352528	0.00511127	5.30848e-12	0.414943	835	Yang	47.5696
CSF	HGF	P14210	rs10248271	7	81417306	T	G	-0.0432409	0.00588803	2.07507e-13	0.77038	835	Yang	53.9324
CSF	HGFA	Q04756	rs1203107	4	3459849	T	C	-0.231892	0.0165646	1.57507e-44	0.105299	835	Yang	195.979
CSF	HPLN1	P10915	rs4274957	5	83207463	G	A	0.193551	0.00826344	2.5164e-121	0.323864	835	Yang	548.617
CSF	IDUA	P35475	rs35220088	4	1010251	G	C	0.0711615	0.0052938	3.41122e-41	0.635088	835	Yang	180.699
CSF	IFN-a/b R1	P17181	rs12483293	21	34716789	C	A	0.0237969	0.00428739	2.84952e-08	0.272485	835	Yang	30.8074
CSF	IGF-II receptor	P11717	rs628031	6	160560845	G	A	-0.0348801	0.00423155	1.68143e-16	0.625083	835	Yang	67.9447
CSF	IL-1 R AcP	Q9NPH3	rs9813227	3	190340177	C	A	0.161939	0.00881443	2.20016e-75	0.847638	835	Yang	337.532
CSF	IL-1 R4	Q01638	rs10178436	2	102926511	G	A	0.310681	0.0105531	1.70536e-190	0.463667	835	Yang	866.696
CSF	IL-1 sRI	P14778	rs6722640	2	102661613	T	A	0.0362003	0.00403979	3.2193e-19	0.420888	835	Yang	80.2984
CSF	IL-1 sRII	P27930	rs7561460	2	102617204	G	A	-0.0374856	0.00658103	1.22646e-08	0.395264	835	Yang	32.4445
CSF	IL-16	Q14005	rs17875509	15	81590775	G	C	-0.0699534	0.00641748	1.14699e-27	0.903409	835	Yang	118.82
CSF	IL-17 sR	Q96F46	rs2286951	22	17612744	G	A	0.0628858	0.00761901	1.5343e-16	0.794396	835	Yang	68.1253
CSF	IL-18 Ra	Q13478	rs1362350	2	102951798	G	C	0.143705	0.00523964	1.32522e-165	0.509699	835	Yang	752.213
CSF	IL-22	Q9GZX6	rs11177138	12	68652776	G	A	-0.0709875	0.00492861	4.94314e-47	0.806462	835	Yang	207.451
CSF	IL-34	Q6ZMJ4	rs36097154	16	70662816	G	A	-0.0481883	0.00371146	1.51473e-38	0.662099	835	Yang	168.575
CSF	IL-6 sRa	P08887	rs4129267	1	154426264	T	C	0.11181	0.00512125	1.13843e-105	0.409606	835	Yang	476.661
CSF	IL-9	P15248	rs2069885	5	135228165	G	A	-0.11493	0.00981612	1.1559e-31	0.876923	835	Yang	137.084
CSF	IL-9	P15248	rs7711775	5	135270062	A	C	0.140559	0.0248406	1.52753e-08	0.0339041	835	Yang	32.018
CSF	ILT-2	Q8NHL6	rs2114511	19	55145093	G	C	-0.229846	0.0151633	6.70529e-52	0.933198	835	Yang	229.766
CSF	Kallikrein 11	Q9UBX7	rs2691258	19	51517286	G	A	0.0826901	0.00667108	2.77051e-35	0.417184	835	Yang	153.644
CSF	kallikrein 8	O60259	rs2659091	19	51446530	G	A	-0.0465902	0.00523658	5.73384e-19	0.624659	835	Yang	79.1579
CSF	Layilin	Q6UX15	rs674230	11	111437887	G	A	-0.077456	0.00659539	7.58509e-32	0.648199	835	Yang	137.921
CSF	LEG9	O00182	rs3794195	17	25959355	G	A	-0.0261146	0.00387595	1.61025e-11	0.216892	835	Yang	45.3952
CSF	LRP8	Q14114	rs12031155	1	53714139	T	C	0.0508676	0.00586483	4.19692e-18	0.389222	835	Yang	75.2265
CSF	Luteinizing hormone	P01215, P01229	rs75287599	19	49517140	T	C	-0.189818	0.019496	2.11166e-22	0.0732695	835	Yang	94.7949
CSF	LY86	O95711	rs7757934	6	6578927	G	A	-0.0374461	0.00408932	5.33322e-20	0.272029	835	Yang	83.8517
CSF	Lysozyme	P61626	rs57954211	12	69748397	C	A	-0.0811215	0.00488232	5.39433e-62	0.567831	835	Yang	276.07
CSF	MIA	Q16674	rs13108	19	41271104	G	A	0.0799671	0.0127835	3.96223e-10	0.0841683	835	Yang	39.1314
CSF	MIC-1	Q99988	rs7251610	19	18489734	T	C	-0.0465713	0.00641472	3.86889e-13	0.316818	835	Yang	52.7086
CSF	MIP-5	Q16663	rs7208990	17	34329475	G	C	0.145186	0.0106481	2.48112e-42	0.0627178	835	Yang	185.912
CSF	MMEL1	Q495T6	rs10909839	1	2708430	G	A	0.0914117	0.00491765	3.98332e-77	0.672032	835	Yang	345.531
CSF	MMP-2	P08253	rs1347653	16	55505040	A	C	-0.0317887	0.00416013	2.15074e-14	0.180508	835	Yang	58.3891
CSF	MMP-8	P22894	rs1939020	11	102590717	T	G	0.171833	0.0108691	2.68598e-56	0.917667	835	Yang	249.933
CSF	MPIF-1	P55773	rs76480185	17	34350933	T	G	-0.0876615	0.0130725	2.00324e-11	0.0241287	835	Yang	44.9676
CSF	MSP	P26927	rs2172252	3	49678307	T	A	-0.267813	0.0131992	1.57305e-91	0.30672	835	Yang	411.688
CSF	N-terminal pro-BNP	P16860	rs12406383	1	11921993	C	A	0.0522893	0.00586601	4.92499e-19	0.727338	835	Yang	79.4583
CSF	NADPH-P450 Oxidoreductase	P16435	rs1057868	7	75615006	T	C	-0.031595	0.00446967	1.56335e-12	0.259506	835	Yang	49.9672
CSF	NAGK	Q9UJ70	rs9636398	2	71288817	G	A	-0.030724	0.00493661	4.85537e-10	0.824019	835	Yang	38.7346
CSF	NET4	Q9HB63	rs17287608	12	96119016	C	A	-0.062989	0.0060995	5.32466e-25	0.159532	835	Yang	106.645
CSF	NID2	Q14112	rs6572807	14	52480621	G	A	-0.0351089	0.0037239	4.17974e-21	0.273453	835	Yang	88.8872
CSF	Nidogen	P14543	rs2031487	1	236175339	G	A	0.0214523	0.00354286	1.40343e-09	0.533793	835	Yang	36.6641
CSF	NRP1	O14786	rs10827216	10	33509513	G	A	-0.0224791	0.00388789	7.38944e-09	0.528466	835	Yang	33.4295
CSF	OLR1	P78380	rs11611438	12	10318409	G	C	-0.0724723	0.0102893	1.87507e-12	0.92151	835	Yang	49.6105
CSF	Osteocalcin	P02818	rs9943105	1	156245245	T	C	-0.0246995	0.00451843	4.59302e-08	0.502329	835	Yang	29.8814
CSF	Osteopontin	P10451	rs36018630	4	88774669	T	C	0.0389893	0.00655409	2.70028e-09	0.203083	835	Yang	35.3889
CSF	P-Selectin	P16109	rs6678795	1	169533266	G	A	0.0730929	0.00779148	6.52672e-21	0.503672	835	Yang	88.0057
CSF	PAFAH	Q13093	rs6907892	6	46625886	T	C	0.100342	0.00601286	1.60517e-62	0.361759	835	Yang	278.486
CSF	PCSK7	Q16549	rs8521	11	117067699	G	A	-0.0886385	0.00489689	3.13028e-73	0.267465	835	Yang	327.646
CSF	PCSK9	Q8NBP7	rs499718	1	55512549	T	C	-0.0901128	0.00751892	4.26829e-33	0.21409	835	Yang	143.636
CSF	PDGF Rb	P09619	rs3776081	5	149532107	G	A	-0.16661	0.00846645	3.27283e-86	0.299245	835	Yang	387.258
CSF	Periostin	Q15063	rs9547908	13	38069809	T	C	-0.0758963	0.00769954	6.37731e-23	0.674465	835	Yang	97.1653
CSF	PIGR	P01833	rs2275529	1	207119853	C	A	0.108083	0.0143348	4.70234e-14	0.705745	835	Yang	56.8505
CSF	PLXC1	O60486	rs2361355	12	94630029	G	A	-0.0355831	0.00595779	2.33603e-09	0.437084	835	Yang	35.6711
CSF	PPAC	P24666	rs57542652	2	228088	G	A	0.236577	0.00827081	6.01722e-180	0.677473	835	Yang	818.18
CSF	Prekallikrein	P03952	rs2304595	4	187172280	G	A	0.0392912	0.00657057	2.23303e-09	0.607477	835	Yang	35.759
CSF	PSMA	Q04609	rs138800869	11	49038966	G	A	0.122141	0.013522	1.67422e-19	0.958753	835	Yang	81.5904
CSF	REG4	Q9BYZ8	rs2994816	1	120371217	G	A	0.0494164	0.00740448	2.49171e-11	0.245825	835	Yang	44.5403
CSF	Semaphorin 3E	O15041	rs2535371	7	83147251	C	A	-0.176884	0.0142988	3.77207e-35	0.819612	835	Yang	153.031
CSF	sFRP-3	Q92765	rs78177114	2	183730429	G	A	0.0732512	0.00974679	5.67295e-14	0.0713807	835	Yang	56.4815
CSF	sICAM-1	P05362	rs5498	19	10395683	G	A	-0.170336	0.0050788	1e-200	0.424817	835	Yang	1124.84
CSF	SIG14	Q08ET2	rs7250849	19	52158316	A	C	-0.213572	0.0141822	3.00554e-51	0.118839	835	Yang	226.778
CSF	Siglec-3	P20138	rs3865444	19	51727962	C	A	-0.160134	0.00715778	7.37378e-111	0.701597	835	Yang	500.507
CSF	Siglec-7	Q9Y286	rs2075803	19	51628529	G	A	0.041326	0.00663533	4.71885e-10	0.561585	835	Yang	38.7902
CSF	Siglec-9	Q9Y336	rs2673908	19	51627766	A	C	1.12657	0.0315481	1e-200	0.395381	835	Yang	1275.17
CSF	sL-Selectin	P14151	rs72712053	1	169640642	T	G	-0.0589202	0.00498226	2.86436e-32	0.759763	835	Yang	139.855
CSF	SLAMF7	Q9NQ25	rs3766374	1	160720554	G	A	-0.0967191	0.0076104	5.28357e-37	0.717096	835	Yang	161.514
CSF	sLeptin R	P48357	rs6665672	1	66069020	G	A	-0.2352	0.00749089	1e-200	0.814652	835	Yang	985.843
CSF	Spondin-1	Q9HCB6	rs7935294	11	13963974	C	A	0.0274456	0.00432957	2.31107e-10	0.430194	835	Yang	40.1842
CSF	SREC-I	Q14162	rs62088045	17	1545333	T	C	0.154818	0.0143885	5.32428e-27	0.0338245	835	Yang	115.775
CSF	sTie-1	P35590	rs3768046	1	43766426	G	A	-0.0291955	0.00521062	2.1058e-08	0.635389	835	Yang	31.3945
CSF	Tenascin	P24821	rs72758637	9	117805201	G	C	0.21094	0.00906676	9.98204e-120	0.157664	835	Yang	541.27
CSF	Testican-2	Q92563	rs1245546	10	73846826	T	C	-0.050451	0.00497486	3.62659e-24	0.484828	835	Yang	102.844
CSF	TFPI	P10646	rs13035938	2	188390112	G	A	0.0293635	0.00524121	2.11369e-08	0.262887	835	Yang	31.3872
CSF	TIG2	Q99969	rs10282458	7	150045302	G	A	0.0192769	0.00338426	1.22615e-08	0.728883	835	Yang	32.445
CSF	TIMD3	Q8TDQ0	rs6874178	5	156530149	T	A	0.0909462	0.00701162	1.79198e-38	0.816566	835	Yang	168.241
CSF	TNFSF15	O95150	rs6478109	9	117568766	G	A	0.0581364	0.00520796	6.18792e-29	0.714524	835	Yang	124.612
CSF	TPSB2	P20231	rs1054648	16	1271471	T	C	0.457599	0.0230034	4.70998e-88	0.104447	835	Yang	395.718
CSF	TrATPase	P13686	rs8112083	19	11707266	G	A	0.045859	0.00519346	1.04548e-18	0.284775	835	Yang	77.9713
CSF	TSG-6	P98066	rs6433375	2	152208657	G	A	0.0521653	0.0074451	2.44076e-12	0.522004	835	Yang	49.0933
CSF	TSP4	P35443	rs2438638	5	79390200	G	A	0.0395023	0.00504361	4.79607e-15	0.650216	835	Yang	61.3425
CSF	ULBP-3	Q9BZM4	rs12661513	6	150373839	C	A	-0.0677042	0.00542413	9.35689e-36	0.865886	835	Yang	155.801
CSF	Vitronectin	P04004	rs708100	17	26688663	G	A	-0.41848	0.0139205	1.51146e-198	0.525384	835	Yang	903.737
CSF	vWF	P04275	rs1558325	12	6289108	G	A	0.0374385	0.00643404	5.92648e-09	0.558882	835	Yang	33.8587
CSF	WFKN2	Q8TEU8	rs11868519	17	48920101	T	C	0.130114	0.0075478	1.36159e-66	0.654996	835	Yang	297.171
CSF	YKL-40	P36222	rs880633	1	203152801	G	A	0.195833	0.00674056	1.41389e-185	0.500681	835	Yang	844.072

## Sheet: Table S2
Genetic instruments for external valadation
SNP	exposure	effect_allele	other_allele	beta	se	eaf	pval	samplesize	chr	pos	id
rs2489623	RSPO3	C	A	0.2104	0.008067	0.41237	6.148e-150	35355	6	127134676	deCODE.same
rs9285458	RSPO3	A	G	0.2336	0.008013	0.44365	7.43e-187	35355	6	127142500	deCODE.sig1
rs9285458	RSPO3	A	G	0.2125	0.007975	0.44365	1.97e-156	35346	6	127142500	deCODE.sig2
rs4644087	RSPO3	A	C	-0.3385	0.0126	0.4456	5.75e-158	513167	6	127481154	FENN.sig1
rs58617845	RSPO3	D	I	-0.2955	0.013	0.4454	1.06e-114	513167	6	127478585	FENN.sig2
rs2489623	RSPO3	A	C	-0.0932	0.0135	0.4581	5.92e-12	513167	6	127455821	FENN.same

## Sheet: Table S3
Genetic instruments of endometriosis for bidirectional MR
chr	beta	pval	samplesize	se	pos	id	SNP	effect_allele	other_allele	eaf
1	0.0017543	1e-11	462933	0.000257986	22465820	ukb-b-10903	rs61768001	C	T	0.156522
4	-0.00132899	2e-10	462933	0.000208852	55995061	ukb-b-10903	rs9992737	T	C	0.280266
11	-0.00162446	1.5e-09	462933	0.000268619	30226356	ukb-b-10903	rs11031005	C	T	0.142679

## Sheet: Table S4
Phenotype scanning summary of RSPO3
Tissue	Protein	UniProt	SNP	trait	catalog	effect_allele	proxy_SNP	r2	proxy_effect_allele	beta	se	pval	ancestry	pmid	MR-beta	MR-se	MR-pval
Plasma	RSPO3	Q9BXY4	rs2489623	Waist circumference	GWAS	C				0.019	0.0034	3.4e-08	European	25673412	0.0703704	0.0125926	2.29E-08
Plasma	RSPO3	Q9BXY4	rs2489623	Hip circumference	GWAS	C				-0.01477	0.002412	9.08e-10	European	UKBB	-0.0547037	0.00893333	9.15137e-10
Plasma	RSPO3	Q9BXY4	rs2489623	Red blood cell count	GWAS	C	rs1936807	0.96101	G	0.02339	0.003556	4.765e-11	European	27863252	0.0866296	0.0131704	4.78053e-11
Plasma	RSPO3	Q9BXY4	rs2489623	Waist hip ratio adjusted for BMI in females greater than 50 years of age	GWAS	C	rs1936807	0.96101	G	0.048	0.0057	4.3e-17	European	26426971	0.177778	0.0211111	3.73117e-17
Plasma	RSPO3	Q9BXY4	rs2489623	Waist circumference in physically active indivdiuals	GWAS	C	rs1936807	0.96101	G	0.0274	0.0043	2.22e-10	European	28448500	0.101482	0.0159259	1.86466e-10
Plasma	RSPO3	Q9BXY4	rs2489623	Waist circumference in non-smokers	GWAS	C	rs1936807	0.96101	G	0.0308	0.0042	1.169e-13	European	28443625	0.114074	0.0155556	2.24498e-13
Plasma	RSPO3	Q9BXY4	rs2489623	Waist circumference adjusted for BMI in active individuals	GWAS	C	rs1936807	0.96101	G	0.0274	0.004307	2e-10	European	28448500	0.101482	0.0159519	1.99485e-10
Plasma	RSPO3	Q9BXY4	rs2489623	Waist circumference adjusted for BMI joint analysis main effects and physical activity interaction	GWAS	C	rs1936807	0.96101	G			1e-09	European	28448500
Plasma	RSPO3	Q9BXY4	rs2489623	Waist hip ratio in females	GWAS	C	rs1936805	0.95719	T	0.05	0.0071	1.59e-12	European	23754948	0.185185	0.0262963	1.89155e-12
Plasma	RSPO3	Q9BXY4	rs2489623	Waist circumference in female non-smokers	GWAS	C	rs1936805	0.95719	T	0.0361	0.0049	1.227e-13	Mixed	28443625	0.133704	0.0181481	1.74057e-13
Plasma	RSPO3	Q9BXY4	rs2489623	Waist to hip ratio adjusted for body mass index	GWAS	C	rs1936805	0.95719	T	0.0414	0.003313	8e-36	Mixed	25673412	0.153333	0.0122704	7.82792e-36
Plasma	RSPO3	Q9BXY4	rs2489623	Hemoglobin concentration	GWAS	C	rs2745353	0.95719	T	0.02452	0.003547	4.797e-12	European	27863252	0.0908148	0.013137	4.74898e-12
Plasma	RSPO3	Q9BXY4	rs2489623	Waist circumference adjusted for BMI	GWAS	C	rs2745353	0.95719	T	0.029	0.0032	5.1e-20	Mixed	25673412	0.107407	0.0118519	1.27494e-19
Plasma	RSPO3	Q9BXY4	rs2489623	Waist hip ratio adjusted for BMI in females less than or equal to 50 years of age	GWAS	C	rs2745353	0.95719	T	0.056	0.0071	4.7e-15	European	26426971	0.207407	0.0262963	3.08735e-15
Plasma	RSPO3	Q9BXY4	rs2489623	Fasting insulin	GWAS	C	rs2745353	0.95719	T			5.48e-09	European	22885924
Plasma	RSPO3	Q9BXY4	rs2489623	log Fasting insulin	GWAS	C	rs2745353	0.95719	T	0.014	0.0025	5.48e-09	European	22885924	0.0518518	0.00925926	2.14352e-08
Plasma	RSPO3	Q9BXY4	rs2489623	Waist circumference adjusted for BMI adjusted for smoking behaviour	GWAS	C	rs2745353	0.95719	T	0.03	0.004361	6e-12	European	28443625	0.111111	0.0161518	6.02081e-12
Plasma	RSPO3	Q9BXY4	rs2489623	Waist circumference adjusted for BMI in non smokers	GWAS	C	rs2745353	0.95719	T	0.0355	0.004867	3e-13	European	28443625	0.131482	0.0180259	3.00839e-13
Plasma	RSPO3	Q9BXY4	rs2489623	Waist circumference adjusted for BMI joint analysis main effects and smoking interaction	GWAS	C	rs2745353	0.95719	T			3e-12	European	28443625
Plasma	RSPO3	Q9BXY4	rs2489623	Waist circumference adjusted for physical activity	GWAS	C	rs2503111	0.93418	A	0.0254	0.004	2.49e-10	European	28448500	0.0940741	0.0148148	2.15315e-10
Plasma	RSPO3	Q9BXY4	rs2489623	Waist circumference adjusted for body mass index	GWAS	C	rs2503111	0.93418	A	0.0254	0.003993	2e-10	European	28448500	0.0940741	0.0147889	2.00272e-10
Plasma	RSPO3	Q9BXY4	rs2489623	Waist hip ratio in non-smokers	GWAS	C	rs2503323	0.92696	G	0.0416	0.0048	4.544e-18	European	28443625	0.154074	0.0177778	4.44955e-18
Plasma	RSPO3	Q9BXY4	rs2489623	Waist hip ratio tails upper and lower 5th percentiles	GWAS	C	rs7745274	0.89615	A			8.8e-10	European	23563607
Plasma	RSPO3	Q9BXY4	rs2489623	Waist hip ratio	GWAS	C	rs7745274	0.89615	A			9e-10	European	23563607
Plasma	RSPO3	Q9BXY4	rs2489623	Waist hip ratio in female non-smokers	GWAS	C	rs2800708	0.88431	T	0.0461	0.0059	5.91e-15	Mixed	28443625	0.170741	0.0218518	5.55952e-15
Plasma	RSPO3	Q9BXY4	rs2489623	Hematocrit	GWAS	C	rs7766106	0.8594	T	0.02358	0.003532	2.435e-11	European	27863252	0.0873333	0.0130815	2.45378e-11
Plasma	RSPO3	Q9BXY4	rs2489623	Waist hip ratio in physically active females	GWAS	C	rs7766106	0.8594	T	0.0567	0.0055	4.15e-25	Mixed	28448500	0.21	0.0203704	6.41048e-25
Plasma	RSPO3	Q9BXY4	rs2489623	Waist hip ratio in physically active indivdiuals	GWAS	C	rs7766106	0.8594	T	0.0438	0.0043	1.65e-24	Mixed	28448500	0.162222	0.0159259	2.28884e-24
Plasma	RSPO3	Q9BXY4	rs2489623	Waist hip ratio adjusted for physical activity in females	GWAS	C	rs7766106	0.8594	T	0.0506	0.0048	5.68e-26	Mixed	28448500	0.187407	0.0177778	5.55064e-26
Plasma	RSPO3	Q9BXY4	rs2489623	Waist hip ratio adjusted for physical activity	GWAS	C	rs7766106	0.8594	T	0.0424	0.004	1.46e-26	European	28448500	0.157037	0.0148148	2.9798e-26
Plasma	RSPO3	Q9BXY4	rs2489623	Waist circumference adjusted for smoking in females	GWAS	C	rs7766106	0.8594	T	0.0437	0.0045	6.315e-22	Mixed	28443625	0.161852	0.0166667	2.70373e-22
Plasma	RSPO3	Q9BXY4	rs2489623	Waist hip ratio adjusted for smoking	GWAS	C	rs7766106	0.8594	T	0.0366	0.0034	3.722e-27	Mixed	28443625	0.135556	0.0125926	5.05226e-27
Plasma	RSPO3	Q9BXY4	rs2489623	Waist hip ratio adjusted for BMI	GWAS	C	rs7766106	0.8594	T	0.042	0.0033	6.4e-37	Mixed	25673412	0.155556	0.0122222	4.17157e-37
Plasma	RSPO3	Q9BXY4	rs2489623	Waist to hip ratio adjusted for BMI adjusted for smoking behaviour	GWAS	C	rs7766106	0.8594	T	0.039	0.002593	4e-51	European	28443625	0.144444	0.0096037	3.98567e-51
Plasma	RSPO3	Q9BXY4	rs2489623	Waist to hip ratio adjusted for BMI in active individuals	GWAS	C	rs7766106	0.8594	T	0.0458	0.004508	3e-24	European	28448500	0.16963	0.0166963	2.99949e-24
Plasma	RSPO3	Q9BXY4	rs2489623	Waist to hip ratio adjusted for BMI in non smokers	GWAS	C	rs7766106	0.8594	T	0.028	0.002302	5e-34	European	28443625	0.103704	0.00852593	4.87272e-34
Plasma	RSPO3	Q9BXY4	rs2489623	Waist to hip ratio adjusted for BMI joint analysis for main effect and physical activity interaction	GWAS	C	rs7766106	0.8594	T			4e-26	European	28448500
Plasma	RSPO3	Q9BXY4	rs2489623	Waist to hip ratio adjusted for BMI joint analysis main effects and smoking interaction	GWAS	C	rs7766106	0.8594	T			3e-34	European	28443625
Plasma	RSPO3	Q9BXY4	rs2489623	Waist to hip ratio adjusted for body mass index	GWAS	C	rs7766106	0.8594	T	0.0424	0.003962	1e-26	European	28448500	0.157037	0.0146741	9.99647e-27
Plasma	RSPO3	Q9BXY4	rs2489623	Hip circumference adjusted for BMI	GWAS	C	rs9491696	0.85598	G	-0.021	0.0035	4.7e-10	Mixed	25673412	-0.0777778	0.012963	1.97318e-09
Plasma	RSPO3	Q9BXY4	rs2489623	Waist hip ratio in females	GWAS	C	rs9491696	0.85598	G	0.044	0.0043	6.8e-25	Mixed	25673412	0.162963	0.0159259	1.41725e-24
Plasma	RSPO3	Q9BXY4	rs2489623	Waist hip ratio	GWAS	C	rs9491696	0.85598	G	0.03974	0.005149	1.182e-14	European	23754948	0.147185	0.0190704	1.18166e-14
Plasma	RSPO3	Q9BXY4	rs2489623	Waist hip ratio	GWAS	C	rs9491696	0.85598	G	0.037	0.0032	1.4e-30	Mixed	25673412	0.137037	0.0118519	6.38232e-31
Plasma	RSPO3	Q9BXY4	rs2489623	Waist hip ratio	GWAS	C	rs9491696	0.85598	G			1.84e-40	European	20935629
Plasma	RSPO3	Q9BXY4	rs2489623	Reticulocyte count	GWAS	C	rs1936800	0.84432	T	0.02034	0.003596	1.545e-08	European	27863252	0.0753333	0.0133185	1.54685e-08
Plasma	RSPO3	Q9BXY4	rs2489623	Waist hip ratio adjusted for smoking in males	GWAS	C	rs1936800	0.84432	T	0.0317	0.0055	6.606e-09	Mixed	28443625	0.117407	0.0203704	8.23207e-09
Plasma	RSPO3	Q9BXY4	rs2489623	Waist hip ratio adjusted for BMI in males greater than 50 years of age	GWAS	C	rs1936800	0.84432	T	0.035	0.0061	1.1e-08	European	26426971	0.12963	0.0225926	9.59681e-09
Plasma	RSPO3	Q9BXY4	rs2489623	Waist circumference adjusted for smoking	GWAS	C	rs1936800	0.84432	T	0.0241	0.0036	1.82e-11	Mixed	28443625	0.0892593	0.0133333	2.16493e-11
Plasma	RSPO3	Q9BXY4	rs2489623	High density lipoprotein	GWAS	C	rs1936800	0.84432	T	-0.02	0.0034	3.055e-10	European	24097068	-0.0740741	0.0125926	4.04475e-09
Plasma	RSPO3	Q9BXY4	rs2489623	HDL cholesterol	GWAS	C	rs1936800	0.84432	T	-0.02	0.003175	3e-10	European	24097068	-0.0740741	0.0117593	2.99161e-10
Plasma	RSPO3	Q9BXY4	rs2489623	Triglycerides	GWAS	C	rs1936800	0.84432	T	-0.02	0.003609	3e-08	European	24097068	-0.0740741	0.0133667	2.99547e-08
Plasma	RSPO3	Q9BXY4	rs2489623	Varicose veins of lower extremities	GWAS	C	rs1936800	0.84432	T	-0.001945	0.0003466	1.994e-08	European	UKBB	-0.0072037	0.0012837	2.00399e-08
Plasma	RSPO3	Q9BXY4	rs2489623	Waist hip ratio in males	GWAS	C	rs9285458	0.8333	A	0.03	0.0048	2.9e-10	Mixed	25673412	0.111111	0.0177778	4.10453e-10
Plasma	RSPO3	Q9BXY4	rs2489623	Waist hip ratio adjusted for BMI in males less than or equal to 50 years of age	GWAS	C	rs9285458	0.8333	A	0.046	0.0078	2.3e-09	European	26426971	0.17037	0.0288889	3.69194e-09
Plasma	RSPO3	Q9BXY4	rs2489623	Fracture of forearm	GWAS	C	rs9285458	0.8333	A	-0.001436	0.0002396	2.078e-09	European	UKBB	-0.00531852	0.000887407	2.05597e-09
Plasma	RSPO3	Q9BXY4	rs2489623	Fractured or broken bones in last 5 years	GWAS	C	rs9285458	0.8333	A	-0.005094	0.0007206	1.565e-12	European	UKBB	-0.0188667	0.00266889	1.55932e-12
Plasma	RSPO3	Q9BXY4	rs2489623	Heel bone mineral density	GWAS	C	rs9285458	0.8333	A	0.06988	0.003117	3.461e-111	European	UKBB	0.258815	0.0115444	2.56934e-111
Plasma	RSPO3	Q9BXY4	rs2489623	Heel bone mineral density left	GWAS	C	rs9285458	0.8333	A	0.07578	0.004154	3.158e-74	European	UKBB	0.280667	0.0153852	2.36666e-74
Plasma	RSPO3	Q9BXY4	rs2489623	Heel bone mineral density right	GWAS	C	rs9285458	0.8333	A	0.07512	0.004129	7.546e-74	European	UKBB	0.278222	0.0152926	5.83556e-74
Plasma	RSPO3	Q9BXY4	rs2489623	R-spondin-3	pQTL	C				0.27	0.0245	3.63e-28	European	29875488	1	0.0907407	3.04674e-28
Plasma	RSPO3	Q9BXY4	rs2489623	Chymotrypsinogen B	pQTL	C	rs4053254	0.88441	CAT	0.1442	0.0249	7.41e-09	European	29875488	0.534074	0.0922222	6.99e-09

## Sheet: Table S5
Tweenty-three medications for endometriosis and their corresponding drug targets
Medication	Target	Uniprot ID	Gene Name	Function	Medication Status
Gestrinone	Sex hormone-binding globulin	P04278	SHBG	Antagonist	Proved
	Progesterone receptor	P06401	PGR	Antagonist/Agonist
	Glucocorticoid receptor	P04150	NR3C1	Antagonist
	Androgen receptor	P10275	AR	Antagonist
	Gonadotropin-releasing hormone receptor	P30968	GNRHR	Antagonist
	Estrogen receptor	P03372	ESR1	Antagonist/Agonist
Medroxyprogesterone acetate	Progesterone receptor	P06401	PGR	Agonist	Proved
	Estrogen receptor	P03372	ESR1	Agonist
	ATP-dependent translocase	P08183	ABCB1	Inhibitor
	GABA family	P14867	Gamma-aminobutyric acid receptor subunit alpha-1	Inhibitor
		P47869	Gamma-aminobutyric acid receptor subunit alpha-2
		P34903	Gamma-aminobutyric acid receptor subunit alpha-3
		P48169	Gamma-aminobutyric acid receptor subunit alpha-4
		P31644	Gamma-aminobutyric acid receptor subunit alpha-5
		Q16445	Gamma-aminobutyric acid receptor subunit alpha-6
		P18505	Gamma-aminobutyric acid receptor subunit beta-1
		P47870	Gamma-aminobutyric acid receptor subunit beta-2
		P28472	Gamma-aminobutyric acid receptor subunit beta-3
		O14764	Gamma-aminobutyric acid receptor subunit delta
		P78334	Gamma-aminobutyric acid receptor subunit epsilon
		Q8N1C3	Gamma-aminobutyric acid receptor subunit gamma-1
		P18507	Gamma-aminobutyric acid receptor subunit gamma-2
		Q99928	Gamma-aminobutyric acid receptor subunit gamma-3
		O00591	Gamma-aminobutyric acid receptor subunit pi
		Q9UN88	Gamma-aminobutyric acid receptor subunit theta
Leuprolide	Gonadotropin-releasing hormone receptor	P30968	GNRHR	Agonist	Proved
Relugolix	Gonadotropin-releasing hormone receptor	P30968	GNRHR	Antagonist	Proved
Drospirenone	Mineralocorticoid receptor	P08235	NR3C2	Antagonist	Proved
	Androgen receptor	P10275	AR	Antagonist
	Progesterone receptor	P06401	PGR	Agonist
	Glucocorticoid receptor	P04150	NR3C1	Binder
Danazol	Estrogen receptor	P03372	ESR1	Agonist	Proved
	Androgen receptor	P10275	AR	Agonist
	Progesterone receptor	P06401	PGR	Agonist
	Gonadotropin-releasing hormone receptor	P30968	GNRHR	Negative modulator
	Gonadotropin-releasing hormone receptor 2	Q96P88	GNRHR2	Negative modulator
	C-C motif chemokine 2	P13500	CCL2	Inhibitor
Norethynodrel	Estrogen receptor	P03372	ESR1	Unknow	Proved
	Androgen receptor	P10275	AR	Unknow
	Sex hormone-binding globulin	P04278	SHBG	Unknow
Dydrogesterone	Progesterone receptor	P06401	PGR	Agonist	Proved
Norethisterone	Progesterone receptor	P06401	PGR	Agonist	Proved
	Androgen receptor	P10275	AR	Agonist
	Glucocorticoid receptor	P04150	NR3C1	Agonist
Goserelin	Lutropin-choriogonadotropic hormone receptor	P22888	LHCGR	Agonist	Proved
	Gonadotropin-releasing hormone receptor	P30968	GNRHR	Agonist
Annovera	Progesterone receptor	P06401	PGR	Agonist/Activator	Proved
	Androgen receptor	P10275	AR	Agonist
	Glucocorticoid receptor	P04150	NR3C1	Agonist
Levonorgestrel	Progesterone receptor	P06401	PGR	Modulator	Proved
	3-oxo-5-alpha-steroid 4-dehydrogenase 1	P18405	SRD5A1	Inhibotor
	Estrogen receptor	P03372	ESR1	Unknow
	Androgen receptor	P10275	AR	Binder
	Sex hormone-binding globulin	P04278	SHBG	Inhibotor/Binder
	Glucocorticoid receptor	P04150	NR3C1	Binder
Buserelin	Lutropin-choriogonadotropic hormone receptor	P22888	LHCGR	NA	Proved
	Gonadotropin-releasing hormone receptor	P30968	GNRHR	NA
Elagolix	Gonadotropin-releasing hormone receptor	P30968	GNRHR	Antagonist	Proved
Nafarelin	Gonadotropin-releasing hormone receptor	P30968	GNRHR	Agonist	Proved
	Gonadotropin-releasing hormone receptor 2	Q96P88	GNRHR2	Agonist
Dienogest	Progesterone receptor	P06401	PGR	Agonist	Proved
	Androgen receptor	P10275	AR	Antagonist
Linzagolix	Gonadotropin-releasing hormone receptor	P30968	GNRHR	Antagonist	Proved
FP-1096	NA	NA	NA	NA	investigate
Telapristone acetate	Progesterone receptor	P06401	PGR	Unknow	investigate
Estradiol sulfamate	NA	NA	NA	NA	investigate
Ormeloxifene	Estrogen receptor	P03372	ESR1	Modulator	investigate
	Estrogen receptor beta	Q92731	ESR2	Modulator
Teverelix	Gonadotropin-releasing hormone receptor	P30968	GNRHR	Antagonist	investigate
Sufugolix	Gonadotropin-releasing hormone receptor	P30968	GNRHR	Unknow	investigate

## Sheet: Table S6
Interacted proteins between potential drug targets and current medications targeting proteins
suggestive protein	medication target	neighborhood on chromosome	gene fusion	phylogenetic cooccurrence	homology	coexpression	experimentally determined interaction	database_annotated	automated textmining	combined score	related medicine
CREB3L4	GABRB3	0	0	0	0	0	0	0	0.4	0.4	Medroxyprogesterone acetate
ENTPD1	CCL2	0	0	0	0	0.057	0	0	0.434	0.444	Danazol
FN1	CCL2	0	0	0	0	0.087	0	0	0.709	0.723	Danazol
FN1	PGR	0	0	0	0	0	0	0	0.424	0.424	Gestrinone/Medroxyprogesterone acetate/Drospirenone/Danazol/Dydrogesterone/Norethisterone/Annovera/Levonorgestrel/Dienogest/Telapristone acetate
FN1	ESR2	0	0	0	0	0	0	0	0.561	0.561	Ormeloxifene
FN1	ABCB1	0	0	0	0	0.111	0	0	0.356	0.403	Medroxyprogesterone acetate
FN1	SHBG	0	0	0	0	0.052	0	0	0.494	0.499	Gestrinone/Norethynodrel/Levonorgestrel
FN1	ESR1	0	0	0	0	0	0.9	0	0.707	0.969	Gestrinone/Medroxyprogesterone acetate/Danazol/Norethynodrel/Levonorgestrel/Ormeloxifene
LGALS3	CCL2	0	0	0	0	0.139	0	0	0.734	0.761	Danazol
LGALS3	ABCB1	0	0	0	0	0	0.407	0	0.187	0.498	Medroxyprogesterone acetate
MBL2	CCL2	0	0	0	0	0.051	0	0	0.404	0.41	Danazol
MBL2	LHCGR	0	0	0	0	0.091	0	0	0.409	0.44	Goserelin/Buserelin
SHANK3	GABRA4	0	0	0	0	0.057	0	0	0.639	0.645	Medroxyprogesterone acetate
SHANK3	GABRB3	0	0	0	0	0.055	0.05	0	0.745	0.751	Medroxyprogesterone acetate

## Sheet: Table S7
KEGG pathway enrichment analysis for 29 suggestive proteins
Category	Term	Count	%	PValue	Genes	List Total	Pop Hits	Pop Total	Fold Enrichment	Bonferroni	Benjamini	FDR
KEGG_PATHWAY	hsa00511: Other glycan degradation	2	6.89655	0.0330491	B7Z754, Q9Y2E5, O00462, E9PCD7	17	18	8586	56.1176	0.953032	1	1
